# Supplementary material for: Ethynyl-substituted benzosiloxaboroles: the role of C(π)⋯B interactions in their crystal packing and use in Cu(i)-catalyzed 1,3-dipolar cycloaddition
Source: Royal Society of Chemistry journal article supplement (doi:10.1039/d4ra02137a), 2024-01-01
Supplement: d4ra02137a1.pdf [file d4ra02137a1.pdf]

## Supporting Information

### **Ethynyl-substituted benzosiloxaboroles: the role of C( $\pi$ )...B interactions in their crystal packing and use in Huisgen 1,3-dipolar cycloaddition**

P. Pacholak,<sup>a,b</sup> K. Durka\*,<sup>a</sup> K. Woźniak<sup>b</sup> J. Krajewska,<sup>c</sup> A. E. Laudy\*,<sup>c</sup> S. Luliński\*<sup>a</sup>

<sup>[a]</sup> *Faculty of Chemistry, Warsaw University of Technology, Noakowskiego 3, 00-664 Warsaw, Poland*

<sup>[b]</sup> *University of Warsaw, Faculty of Chemistry, Warsaw, Poland, Pasteura 1, 02-093*

<sup>[c]</sup> *Department of Pharmaceutical Microbiology and Bioanalysis, Medical University of Warsaw, Banacha 1b, 02-097 Warsaw, Poland*

Email address: sergiusz.lulinski@pw.edu.pl (S. Luliński).

Email address: alaudy@wp.pl (A. E. Laudy).

## 1. Structural and computational studies

**Table S1.1.** Selected crystal data, data collection and refinement parameters for **1c**, **1c·MeCN** and **2c**.

|                                              | <b>1c</b>                                                                          | <b>1c·MeCN</b>                                                                     | <b>2c</b>                                                                          |
|----------------------------------------------|------------------------------------------------------------------------------------|------------------------------------------------------------------------------------|------------------------------------------------------------------------------------|
| Formula                                      | C <sub>10</sub> H <sub>10</sub> BO <sub>2</sub> SiF                                | C <sub>12</sub> H <sub>13</sub> BO <sub>2</sub> SiNF                               | C <sub>10</sub> H <sub>10</sub> O <sub>2</sub> ClSiB                               |
| Weight                                       | 220.08                                                                             | 261.13                                                                             | 236.53                                                                             |
| <i>T</i> / K                                 | 100(2)                                                                             | 100(2)                                                                             | 100(2)                                                                             |
| Crystal system                               | triclinic                                                                          | monoclinic                                                                         | triclinic                                                                          |
| Space group                                  | <i>P</i> -1                                                                        | <i>P</i> 2 <sub>1</sub> / <i>m</i>                                                 | <i>P</i> -1                                                                        |
| <i>a</i> / Å                                 | 6.9862(2)                                                                          | 8.6127(2)                                                                          | 6.9876(3)                                                                          |
| <i>b</i> / Å                                 | 7.4451(2)                                                                          | 7.0177(2)                                                                          | 7.7137(4)                                                                          |
| <i>c</i> / Å                                 | 10.5854(2)                                                                         | 11.1617(3)                                                                         | 10.6833(5)                                                                         |
| $\alpha$ / °                                 | 92.553(2)                                                                          | 90                                                                                 | 85.701(4)                                                                          |
| $\beta$ / °                                  | 97.855(2)                                                                          | 97.153(2)                                                                          | 81.858(4)                                                                          |
| $\gamma$ / °                                 | 91.766(2)                                                                          | 90                                                                                 | 89.401(4)                                                                          |
| <i>V</i> / Å <sup>3</sup>                    | 544.49(2)                                                                          | 669.38(3)                                                                          | 568.42(5)                                                                          |
| <i>Z</i>                                     | 2                                                                                  | 2                                                                                  | 2                                                                                  |
| $\rho_{\text{calc}}$ / g·cm <sup>-3</sup>    | 1.342                                                                              | 1.296                                                                              | 1.382                                                                              |
| $\mu$ / mm <sup>-1</sup>                     | 0.204                                                                              | 0.179                                                                              | 3.788                                                                              |
| F(000)                                       | 228.0                                                                              | 272.0                                                                              | 244.0                                                                              |
| Crystal size / mm <sup>3</sup>               | 0.342 × 0.129 ×<br>0.089                                                           | 0.212 × 0.174 ×<br>0.074                                                           | 0.12 × 0.11 × 0.10                                                                 |
| Radiation                                    | MoK $\alpha$<br>( $\lambda$ = 0.71073)                                             | MoK $\alpha$<br>( $\lambda$ = 0.71073)                                             | Cu K $\alpha$<br>( $\lambda$ = 1.54184)                                            |
| 2 $\Theta$ range for data collection / °     | 3.888 to 57.656                                                                    | 4.766 to 67.666                                                                    | 8.384 to 154.988                                                                   |
| Index ranges                                 | -9 ≤ <i>h</i> ≤ 9,<br>-10 ≤ <i>k</i> ≤ 9,<br>-14 ≤ <i>l</i> ≤ 14                   | -13 ≤ <i>h</i> ≤ 12,<br>-10 ≤ <i>k</i> ≤ 10,<br>-16 ≤ <i>l</i> ≤ 17                | -8 ≤ <i>h</i> ≤ 8,<br>-9 ≤ <i>k</i> ≤ 9,<br>-13 ≤ <i>l</i> ≤ 13                    |
| Reflections collected                        | 24998                                                                              | 14332                                                                              | 5118                                                                               |
| Independent reflections                      | 2683<br>[ <i>R</i> <sub>int</sub> = 0.0255,<br><i>R</i> <sub>sigma</sub> = 0.0128] | 2733<br>[ <i>R</i> <sub>int</sub> = 0.0292,<br><i>R</i> <sub>sigma</sub> = 0.0228] | 2404<br>[ <i>R</i> <sub>int</sub> = 0.0154,<br><i>R</i> <sub>sigma</sub> = 0.0148] |
| Data/restraints/parameters                   | 2683/0/139                                                                         | 2733/1/114                                                                         | 2404/1/141                                                                         |
| Goodness-of-fit                              | 1.046                                                                              | 1.085                                                                              | 1.084                                                                              |
| Final <i>R</i> indexes [I >= 2 $\sigma$ (I)] | <i>R</i> <sub>1</sub> = 0.0284,<br><i>wR</i> <sub>2</sub> = 0.0768                 | <i>R</i> <sub>1</sub> = 0.0335,<br><i>wR</i> <sub>2</sub> = 0.0916                 | <i>R</i> <sub>1</sub> = 0.0300,<br><i>wR</i> <sub>2</sub> = 0.0773                 |
| Final <i>R</i> indexes [all data]            | <i>R</i> <sub>1</sub> = 0.0304,<br><i>wR</i> <sub>2</sub> = 0.0783                 | <i>R</i> <sub>1</sub> = 0.0402,<br><i>wR</i> <sub>2</sub> = 0.0971                 | <i>R</i> <sub>1</sub> = 0.0302,<br><i>wR</i> <sub>2</sub> = 0.0775                 |
| Largest diff. peak/hole / e·Å <sup>-3</sup>  | 0.44/-0.23                                                                         | 0.47/-0.34                                                                         | 0.38/-0.37                                                                         |

**Table S1.2.** Selected crystal data, data collection and refinement parameters for **3b**, **4d** and **5b**.

|                                                              | <b>3b</b>                                                                       | <b>4d</b>                                                                                        | <b>5b</b>                                                                                                   |
|--------------------------------------------------------------|---------------------------------------------------------------------------------|--------------------------------------------------------------------------------------------------|-------------------------------------------------------------------------------------------------------------|
| Formula                                                      | C <sub>16</sub> H <sub>16</sub> BN <sub>3</sub> O <sub>5</sub> SiFClS           | C <sub>17</sub> H <sub>15</sub> N <sub>3</sub> O <sub>4</sub> SiSBF <sub>2</sub> Cl <sub>3</sub> | C <sub>36</sub> H <sub>40</sub> N <sub>8</sub> O <sub>5</sub> F <sub>2</sub> Si <sub>2</sub> S <sub>2</sub> |
| Weight                                                       | 455.73                                                                          | 540.63                                                                                           | 823.06                                                                                                      |
| <i>T</i> / K                                                 | 100(2)                                                                          | 100(2)                                                                                           | 100(2)                                                                                                      |
| Crystal system                                               | monoclinic                                                                      | triclinic                                                                                        | monoclinic                                                                                                  |
| Space group                                                  | <i>P2/c</i>                                                                     | <i>P</i> -1                                                                                      | <i>P2<sub>1</sub>/c</i>                                                                                     |
| <i>a</i> / Å                                                 | 15.7378(4)                                                                      | 8.8484(4)                                                                                        | 12.2547(2)                                                                                                  |
| <i>b</i> / Å                                                 | 5.96710(10)                                                                     | 11.1678(4)                                                                                       | 21.3124(4)                                                                                                  |
| <i>c</i> / Å                                                 | 21.2618(5)                                                                      | 12.0146(5)                                                                                       | 14.7890(2)                                                                                                  |
| $\alpha$ / °                                                 | 90                                                                              | 89.089(3)                                                                                        | 90                                                                                                          |
| $\beta$ / °                                                  | 97.318(2)                                                                       | 77.254(3)                                                                                        | 91.9810(10)                                                                                                 |
| $\gamma$ / °                                                 | 90                                                                              | 80.690(3)                                                                                        | 90                                                                                                          |
| <i>V</i> / Å <sup>3</sup>                                    | 1980.41(8)                                                                      | 1142.50(8)                                                                                       | 3860.24(11)                                                                                                 |
| <i>Z</i>                                                     | 4                                                                               | 2                                                                                                | 4                                                                                                           |
| $\rho_{\text{calc}}$ / g·cm <sup>-3</sup>                    | 1.528                                                                           | 1.572                                                                                            | 1.416                                                                                                       |
| $\mu$ / mm <sup>-1</sup>                                     | 3.677                                                                           | 0.592                                                                                            | 2.388                                                                                                       |
| F(000)                                                       | 936.0                                                                           | 548.0                                                                                            | 1720.0                                                                                                      |
| Crystal size / mm <sup>3</sup>                               | 0.15 × 0.11 × 0.10                                                              | 0.21 × 0.107 × 0.104                                                                             | 0.231 × 0.146 × 0.087                                                                                       |
| Radiation                                                    | CuK $\alpha$ ( $\lambda$ = 1.54178)                                             | MoK $\alpha$ ( $\lambda$ = 0.71073)                                                              | CuK $\alpha$ ( $\lambda$ = 1.54178)                                                                         |
| 2 $\Theta$ range for data collection / °                     | 5.662 to 145.38                                                                 | 4.784 to 60.008                                                                                  | 7.218 to 153.4                                                                                              |
| Index ranges                                                 | -19 ≤ <i>h</i> ≤ 19,<br>-7 ≤ <i>k</i> ≤ 7,<br>-21 ≤ <i>l</i> ≤ 26               | -11 ≤ <i>h</i> ≤ 12,<br>-15 ≤ <i>k</i> ≤ 15,<br>-16 ≤ <i>l</i> ≤ 16                              | -15 ≤ <i>h</i> ≤ 15,<br>-26 ≤ <i>k</i> ≤ 26,<br>-18 ≤ <i>l</i> ≤ 12                                         |
| Reflections collected                                        | 15611                                                                           | 19660                                                                                            | 22446                                                                                                       |
| Independent reflections                                      | 3890 [ <i>R</i> <sub>int</sub> = 0.0270,<br><i>R</i> <sub>sigma</sub> = 0.0222] | 6007 [ <i>R</i> <sub>int</sub> = 0.0317,<br><i>R</i> <sub>sigma</sub> = 0.0475]                  | 8052 [ <i>R</i> <sub>int</sub> = 0.0357,<br><i>R</i> <sub>sigma</sub> = 0.0380]                             |
| Data/restraints/parameters                                   | 3890/1/265                                                                      | 6007/1/313                                                                                       | 8052/0/496                                                                                                  |
| Goodness-of-fit                                              | 1.040                                                                           | 1.035                                                                                            | 1.017                                                                                                       |
| Final <i>R</i> indexes [ <i>I</i> ≥ 2 $\sigma$ ( <i>I</i> )] | <i>R</i> <sub>1</sub> = 0.0298,<br><i>wR</i> <sub>2</sub> = 0.0764              | <i>R</i> <sub>1</sub> = 0.0489,<br><i>wR</i> <sub>2</sub> = 0.1085                               | <i>R</i> <sub>1</sub> = 0.0445,<br><i>wR</i> <sub>2</sub> = 0.1170                                          |
| Final <i>R</i> indexes [all data]                            | <i>R</i> <sub>1</sub> = 0.0360,<br><i>wR</i> <sub>2</sub> = 0.0810              | <i>R</i> <sub>1</sub> = 0.0670,<br><i>wR</i> <sub>2</sub> = 0.1181                               | <i>R</i> <sub>1</sub> = 0.0497,<br><i>wR</i> <sub>2</sub> = 0.1226                                          |
| Largest diff. peak/hole / e·Å <sup>-3</sup>                  | 0.35/-0.37                                                                      | 0.74/-0.68                                                                                       | 0.56/-0.36                                                                                                  |

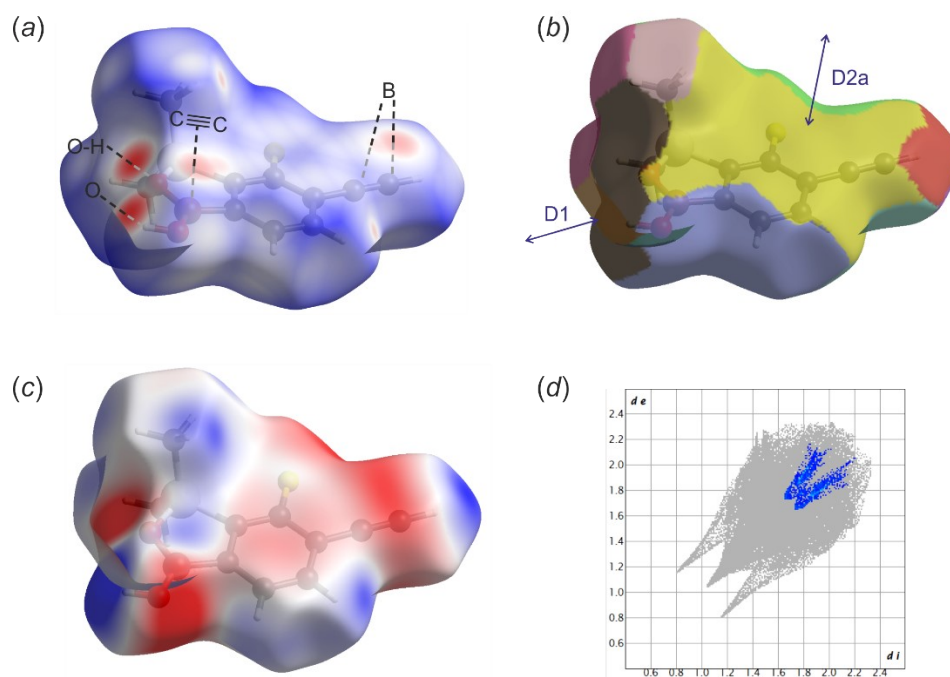

**Figure S1.1** Hirshfeld surfaces generated for **1c** with mapped (a)  $d_{\text{norm}}$  property value over the range  $-0.50$  to  $1.30$ , (b) fragment patch, (c) electrostatic potential over the range  $-0.06$  to  $0.08$  a.u. (d) Fingerprint plots with marked C...B contacts.

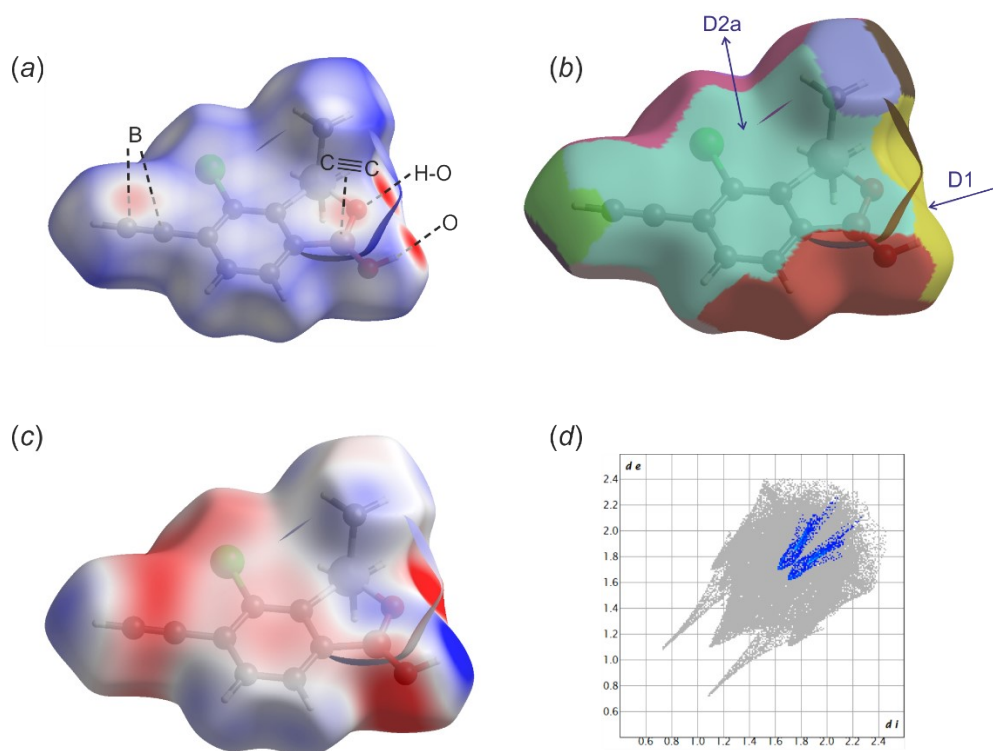

**Figure S1.2.** Hirshfeld surfaces generated for **2c** with mapped (a)  $d_{\text{norm}}$  property value over the range  $-0.50$  to  $1.30$ , (b) fragment patch, (c) electrostatic potential over the range  $-0.06$  to  $0.08$  a.u. (d) Fingerprint plots with marked C...B contacts.

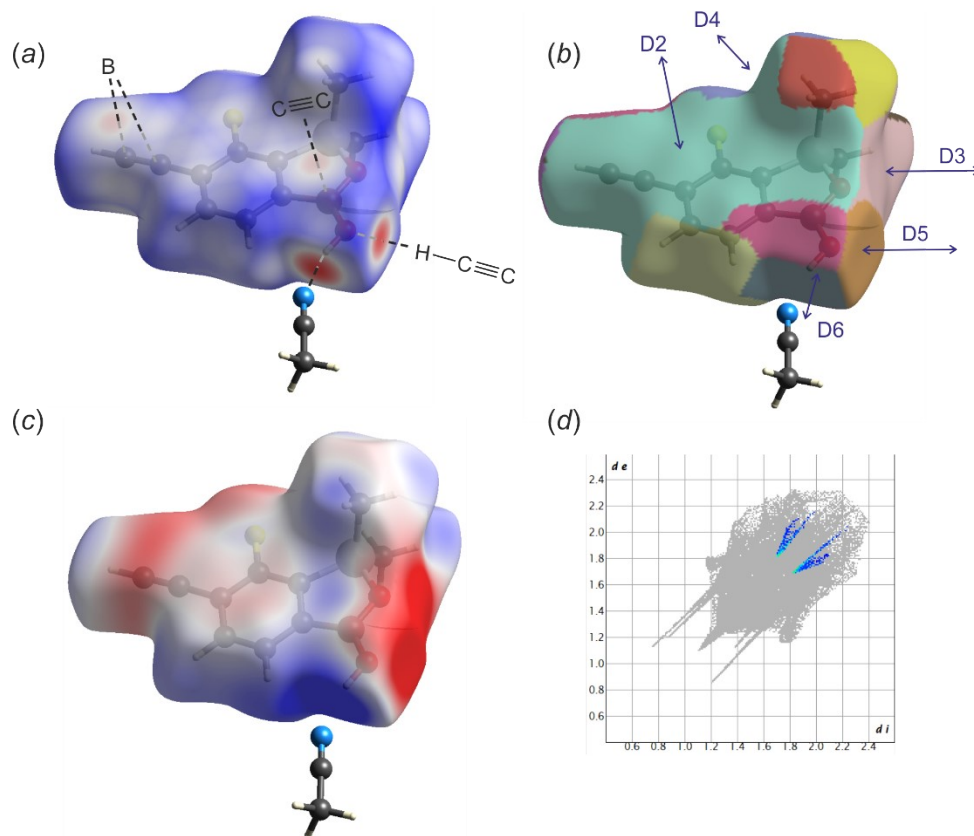

**Figure S1.3.** Hirshfeld surfaces generated for **1c**·MeCN with mapped (a)  $d_{\text{norm}}$  property value over the range  $-0.50$  to  $1.30$ , (b) fragment patch, (c) electrostatic potential over the range  $-0.06$  to  $0.08$  a.u. (d) Fingerprint plots with marked C...B contacts.

**Table S1.3.** The intermolecular donor-acceptor orbital  $C(\pi)\dots B$  interaction energies ( $\text{kJ}\cdot\text{mol}^{-1}$ ) estimated by 2<sup>nd</sup>-order perturbation theory within NBO analysis.

| Structure                                                                           | <b>1c</b> |     | <b>2c</b> |     | <b>1c</b> ·MeCN |
|-------------------------------------------------------------------------------------|-----------|-----|-----------|-----|-----------------|
| Motif                                                                               | D2a       | D2b | D2a       | D2b | D2              |
| $E(\pi_{\text{CC}(\text{ethynyl})} \rightarrow \text{p}_B)$                         | 5.1       | 2.6 | 5.4       | 2.3 | 2.7             |
| $E(\pi_{\text{CC}(\text{aromatic})} \rightarrow \pi^*_{\text{CC}(\text{ethynyl})})$ | 0.6       | 0.8 | 0.6       | 1.0 | 0.5             |

**Table S1.4.** Electron density ( $\rho$ ,  $\text{e}\cdot\text{\AA}^{-3}$ ) and negative Laplacian ( $\nabla^2\rho$ ,  $\text{e}\cdot\text{\AA}^{-5}$ ) at BCPs of  $C(\pi)\dots B$  interactions.

| Structure      | <b>1c</b> |       | <b>2c</b> |       | <b>1c</b> ·MeCN |
|----------------|-----------|-------|-----------|-------|-----------------|
| Motif          | D2a       | D2b   | D2a       | D2b   | D2              |
| $\rho$         | 0.033     | 0.035 | 0.035     | 0.036 | 0.036           |
| $\nabla^2\rho$ | 0.33      | 0.36  | 0.35      | 0.36  | 0.35            |

## 2. Antimicrobial activity.

**Table S2.1.** The antibacterial activity of tested agents against standard Gram-positive strains

| Agent tested           | MIC in mg·L <sup>-1</sup> [MBC in mg·L <sup>-1</sup> ] <sup>a</sup> (Diameter of inhibition zone in mm) |                                        |                                         |                                  |                                |                                              |
|------------------------|---------------------------------------------------------------------------------------------------------|----------------------------------------|-----------------------------------------|----------------------------------|--------------------------------|----------------------------------------------|
|                        | <i>S. aureus</i><br>ATCC 6538P                                                                          | <i>S. aureus</i><br>ATCC 43300<br>MRSA | <i>S. epidermidis</i><br>ATCC 12228     | <i>E. faecalis</i><br>ATCC 29212 | <i>E. faecium</i><br>ATCC 6057 | <i>B. subtilis</i><br>ATCC 6633 <sup>b</sup> |
| <b>1c</b>              | 25 [50/400] <sup>c</sup> (25)                                                                           | 25 [50] (20)                           | <b>12.5</b> [25/>400] <sup>c</sup> (29) | 100 (15)                         | 100 (16)                       | NT (26)                                      |
| <b>2c</b>              | <b>12.5</b> [25/200] <sup>c</sup> (21)                                                                  | <b>12.5</b> [25] (23)                  | <b>12.5</b> [400] (26)                  | 50 (20)                          | 50 (21)                        | NT (27)                                      |
| <b>3a</b>              | 25 (22)                                                                                                 | 50 (20)                                | 50 (24)                                 | 200 (-)                          | 200 (11)                       | NT (21)                                      |
| <b>3b</b>              | 50 (20)                                                                                                 | 50 (22)                                | 50 (23)                                 | 200 (-)                          | 200 (-)                        | NT (21)                                      |
| <b>3c</b>              | <b>12.5</b> [25/>400] <sup>c</sup> (22)                                                                 | <b>12.5</b> [25] (23)                  | <b>12.5</b> [25/>400] <sup>c</sup> (29) | 100 (16)                         | 50 (16)                        | NT (27)                                      |
| <b>4a</b>              | 25 (20)                                                                                                 | 50 (20)                                | 50 (25)                                 | 200 (-)                          | 200 (-)                        | NT (23)                                      |
| <b>4b</b>              | 25 (25)                                                                                                 | 50 (21)                                | 50 (20)                                 | 200 (-)                          | 200 (-)                        | NT (18)                                      |
| <b>4c</b>              | 25 (20)                                                                                                 | 50 (22)                                | 50 (24)                                 | 200 (-)                          | 200 (-)                        | NT (20)                                      |
| <b>5a</b>              | >400 (-)                                                                                                | >400 (-)                               | >400 (-)                                | >400 (-)                         | >400 (-)                       | NT (-)                                       |
| <b>5b</b>              | >400 (-)                                                                                                | >400 (-)                               | >400 (-)                                | >400 (-)                         | >400 (-)                       | NT (-)                                       |
| <b>LIN<sup>d</sup></b> | 1 [>128] (25)                                                                                           | 2 [>128] (25)                          | 1 [>128] (26)                           | 2 [>128] (15)                    | 2 [>128] (14)                  | NT (30)                                      |

The highest activity against Gram-positive bacteria indicated by the low MIC values ( $\leq 12.5$  mg·L<sup>-1</sup>) is shown in boldface.

(-): The inhibition zone was not observed in the disc-diffusion method. The diameter of the paper discs was 9 mm.

<sup>a</sup> Only the MBC values  $\leq 400$  mg·L<sup>-1</sup> are presented.

<sup>b</sup> The growth type of *B. subtilis* in the MHB medium prevented reading the MIC values of tested substances.

<sup>c</sup> The Eagle effect [1,2] was observed during the determination of the MBC value of the same tested agents against *Staphylococcus* spp. strains. The Eagle effect is shown in the italic face.

<sup>d</sup> LIN, linezolid was used as a reference agent active against Gram-positive bacteria. The diameter of a commercial disc containing 0.03 mg of linezolid was 6 mm; the MIC of linezolid was determined according to the CLSI recommendations [3].

**Table S2.2.** The antibacterial activity of tested agents against standard Gram-negative strains.

| Agent tested          | MIC in mg·L <sup>-1</sup> [MBC in mg·L <sup>-1</sup> ] <sup>a</sup> / x-fold reduction of MIC in the presence of PAβN <sup>b</sup> (Diameter of inhibition zone in mm) |                                    |                                   |                               |                                    |                                   |                                    |                                     |                                     |                                              |                                                    |
|-----------------------|------------------------------------------------------------------------------------------------------------------------------------------------------------------------|------------------------------------|-----------------------------------|-------------------------------|------------------------------------|-----------------------------------|------------------------------------|-------------------------------------|-------------------------------------|----------------------------------------------|----------------------------------------------------|
|                       | <i>E. coli</i><br>ATCC 25922                                                                                                                                           | <i>K. pneumoniae</i><br>ATCC 13883 | <i>P. mirabilis</i><br>ATCC 12453 | <i>E. cloacae</i><br>DSM 6234 | <i>S. marcescens</i><br>ATCC 13880 | <i>A. baumannii</i><br>ATCC 19606 | <i>P. aeruginosa</i><br>ATCC 27853 | <i>S. maltophilia</i><br>ATCC 13637 | <i>S. maltophilia</i><br>ATCC 12714 | <i>B. cepacia</i><br>ATCC 25416 <sup>c</sup> | <i>B. bronchiseptica</i><br>ATCC 4617 <sup>c</sup> |
| <b>1c</b>             | 400 [400]/4 (13)                                                                                                                                                       | 400 [400]/2 (-)                    | 400/2 (-)                         | 400/2 (-)                     | >400/8 (-)                         | >400 (-)                          | >400 (-)                           | 200 [400]/2 (11)                    | 100 [400] (12)                      | >400 (-)                                     | 400 (-)                                            |
| <b>2c</b>             | >400/8 (-)                                                                                                                                                             | >400 (-)                           | >400/2 (-)                        | >400/2 (-)                    | >400/4 (-)                         | >400/4 (-)                        | >400 (-)                           | 400 [400]/8 (13)                    | 400/4 (-)                           | >400 (-)                                     | 400 (-)                                            |
| <b>3a</b>             | >400 (-)                                                                                                                                                               | >400 (-)                           | >400 (-)                          | >400 (-)                      | >400 (-)                           | >400 (-)                          | >400 (-)                           | >400 (-)                            | >400 (-)                            | >400 (-)                                     | >400 (-)                                           |
| <b>3b</b>             | >400 (-)                                                                                                                                                               | >400 (-)                           | >400 (-)                          | >400 (-)                      | >400 (-)                           | >400 (-)                          | >400 (-)                           | >400/2 (-)                          | >400 (-)                            | >400 (-)                                     | 400 (-)                                            |
| <b>3c</b>             | >400 (-)                                                                                                                                                               | >400 (-)                           | >400 (-)                          | >400 (-)                      | >400 (-)                           | >400 (-)                          | >400 (-)                           | 400/4 (15)                          | >400/4 (-)                          | >400 (-)                                     | >400 (-)                                           |
| <b>4a</b>             | >400 (-)                                                                                                                                                               | >400 (-)                           | >400 (-)                          | >400 (-)                      | >400 (-)                           | >400 (-)                          | >400 (-)                           | >400 (-)                            | >400 (-)                            | >400 (-)                                     | >400 (-)                                           |
| <b>4b</b>             | >400 (-)                                                                                                                                                               | >400 (-)                           | >400 (-)                          | >400 (-)                      | >400 (-)                           | >400 (-)                          | >400 (-)                           | >400/2 (-)                          | >400/2 (-)                          | >400 (-)                                     | 400 (-)                                            |
| <b>4c</b>             | >400 (-)                                                                                                                                                               | >400 (-)                           | >400 (-)                          | >400 (-)                      | >400 (-)                           | >400 (-)                          | >400 (-)                           | >400/2 (-)                          | >400 (-)                            | >400 (-)                                     | >400 (-)                                           |
| <b>5a</b>             | >400 (-)                                                                                                                                                               | >400 (-)                           | >400 (-)                          | >400 (-)                      | >400 (-)                           | >400 (-)                          | >400 (-)                           | >400 (-)                            | >400 (-)                            | >400 (-)                                     | >400 (-)                                           |
| <b>5b</b>             | >400 (-)                                                                                                                                                               | >400 (-)                           | >400 (-)                          | >400 (-)                      | >400 (-)                           | >400 (-)                          | >400 (-)                           | >400 (-)                            | >400 (-)                            | >400 (-)                                     | >400 (-)                                           |
| <b>Nf<sup>d</sup></b> | 8 [8] (24)                                                                                                                                                             | 32 [32] (23)                       | 128 [ <b>&gt;128</b> ] (9)        | 32 [32] (17)                  | 128 [ <b>&gt;128</b> ] (12)        | 64 [128] (9)                      | >128 [ <b>&gt;128</b> ] (-)        | 128 [ <b>&gt;128</b> ] (-)          | 128 [ <b>&gt;128</b> ] (-)          | 32 [32] (12)                                 | 64 [128] (-)                                       |

PAβN: efflux pump inhibitor. The significant decreases (at least a 4-fold) in the MIC values of tested compounds after the addition of PAβN are shown in boldface. The test was performed in the MHB medium supplemented with 1 mM MgSO<sub>4</sub>.

(-): The inhibition zone was not observed in the disc-diffusion method. The diameter of the paper discs was 9 mm.

<sup>a</sup> Only the MBC values ≤400 mg·L<sup>-1</sup> are presented.

<sup>b</sup> In the table, only at least 2-fold decreases in the MIC values of tested compounds after the addition of PAβN are presented.

<sup>c</sup> The growth of *B. cepacia* ATCC 25416 and *B. bronchiseptica* ATCC 4617 strains was inhibited in the MHB medium supplemented with 1 mM MgSO<sub>4</sub> and 20 mg·L<sup>-1</sup> PAβN.

<sup>d</sup> Nf, nitrofurantoin was used as a reference agent active against Gram-negative bacteria. The diameter of a commercial disc containing 0.3 mg of nitrofurantoin was 6 mm; the MIC of nitrofurantoin was determined according to the CLSI recommendations [3].

**Table S2.3.** The antifungal activity of tested agents against standard yeasts strains.

| Agent tested          | MIC in mg·L <sup>-1</sup> [MFC in mg·L <sup>-1</sup> ] <sup>a</sup> (Diameter of inhibition zone in mm) |                                      |                                  |                                 |                                     |                               |                                   |
|-----------------------|---------------------------------------------------------------------------------------------------------|--------------------------------------|----------------------------------|---------------------------------|-------------------------------------|-------------------------------|-----------------------------------|
|                       | <i>C. albicans</i><br>ATCC 90028                                                                        | <i>C. parapsilosis</i><br>ATCC 22019 | <i>C. tropicalis</i><br>ATCC 750 | <i>C. tropicalis</i><br>IBA 171 | <i>C. guilliermondii</i><br>IBA 155 | <i>C. krusei</i><br>ATCC 6258 | <i>S. cerevisiae</i><br>ATCC 9763 |
| <b>1c</b>             | 200 (20)                                                                                                | 400 (15)                             | 100 (20)                         | <b>25</b> [400] (24)            | 400 (23)                            | 400 (23)                      | 200 (14)                          |
| <b>2c</b>             | 100 [400] (22)                                                                                          | 200 (21)                             | 50 [400] (20)                    | <b>12.5</b> [200] (25)          | 100 (37)                            | 100 (15)                      | <b>12.5</b> [200] (28)            |
| <b>3a</b>             | >400 (-)                                                                                                | >400 (-)                             | >400 (-)                         | >400 (-)                        | 400 (-)                             | >400 (-)                      | >400 (-)                          |
| <b>3b</b>             | >400 (-)                                                                                                | >400 (-)                             | >400 (-)                         | >400 (-)                        | >400 (-)                            | >400 (-)                      | >400 (-)                          |
| <b>3c</b>             | >400 (-)                                                                                                | >400 (-)                             | >400 (-)                         | >400 (-)                        | >400 (-)                            | >400 (-)                      | >400 (-)                          |
| <b>4a</b>             | >400 (-)                                                                                                | >400 (-)                             | >400 (-)                         | >400 (-)                        | >400 (-)                            | >400 (-)                      | >400 (-)                          |
| <b>4b</b>             | >400 (-)                                                                                                | >400 (-)                             | >400 (-)                         | >400 (-)                        | >400 (-)                            | >400 (-)                      | >400 (-)                          |
| <b>4c</b>             | >400 (-)                                                                                                | >400 (-)                             | >400 (-)                         | >400 (-)                        | >400 (-)                            | >400 (-)                      | >400 (-)                          |
| <b>5a</b>             | >400 (-)                                                                                                | >400 (-)                             | >400 (-)                         | >400 (-)                        | >400 (-)                            | >400 (-)                      | >400 (-)                          |
| <b>5b</b>             | >400 (-)                                                                                                | >400 (-)                             | >400 (-)                         | >400 (-)                        | >400 (-)                            | >400 (-)                      | >400 (-)                          |
| <b>Fl<sup>b</sup></b> | 1 (43)                                                                                                  | 2 (32)                               | 0.38 (40)                        | 0.38 (39)                       | 0.75 (40)                           | 64 <sup>c</sup> (16)          | 16 <sup>d</sup> (12)              |

The highest activity against yeasts indicated by the low MIC values (25 mg·L<sup>-1</sup>) is shown in boldface.

(-): The inhibition zone was not observed in the disc-diffusion method. The diameter of the paper discs was 9 mm.

<sup>a</sup> Only the MFC values ≤400 mg·L<sup>-1</sup> are presented.

<sup>b</sup> FL, fluconazole was used as a reference antifungal agent; the diameter of a commercial disc containing 0.025 mg of fluconazole was 6 mm; the MIC value of fluconazole was determined by the Etest method [4].

<sup>c</sup> The ellipse was visible pointing the MIC value 64 mg·L<sup>-1</sup>. However, with macro-colonies up to a concentration ≥256 mg·L<sup>-1</sup>. In accordance with the recommendations for the Etest method, the MIC value of fluconazole against *C. krusei* can also be interpreted as ≥256 mg·L<sup>-1</sup> [4,5]. *C. krusei* is intrinsically resistant to fluconazole.

<sup>d</sup> The ellipse was visible pointing the MIC value 16 mg·L<sup>-1</sup>, with colonies up to concentration ≥256 mg·L<sup>-1</sup>. There are no recommendations for the Etest method interpretation of the MIC value of fluconazole against *S. cerevisiae*. The obtained MIC 16 mg·L<sup>-1</sup> is in line with the published results [6].



### 3. References

1. H. Eagle and A. D. Musselman. The rate of bactericidal action of penicillin in vitro as a function of its concentration, and its paradoxically reduced activity at high concentrations against certain organisms. *J. Exp. Med.*, 1948, **88**, 99–131.
2. A. Prasetyoputri, A. M. Jarrad, M. A. Cooper and M. A. T. Blaskovich. The Eagle Effect and Antibiotic-Induced Persistence: Two Sides of the Same Coin? *Trends Microbiol.*, 2019, **27**, 339–354.
3. Clinical and Laboratory Standards Institute. 2012. Methods for dilution antimicrobial susceptibility tests for bacteria that grow aerobically. Approved Standard, 9th ed. CLSI guideline M07-A9. Wayne, PA, USA.
4. ETEST. Application guide, BioMerieux., [https://www.biomerieux-usa.com/sites/subsidiary\\_us/files/supplementary\\_inserts\\_-\\_16273\\_-\\_b\\_-\\_en\\_-\\_eag\\_-\\_etest\\_application\\_guide-3.pdf](https://www.biomerieux-usa.com/sites/subsidiary_us/files/supplementary_inserts_-_16273_-_b_-_en_-_eag_-_etest_application_guide-3.pdf) (accessed 1 February 2024).
5. A. Espinel-Ingroff. Etest for antifungal susceptibility testing of yeasts, *Diagn. Microbiol. Infect. Dis.*, 1994, **19**, 217–220.
6. M. A. Pfaller, M. Bale, B. Buschelman, M. Lancaster, A. Espinel-Ingroff, J. H. Rex and M. G. Rinaldi. Selection of candidate quality control isolates and tentative quality control ranges for *in vitro* susceptibility testing of yeast isolates by National Committee for Clinical Laboratory Standards proposed standard methods, *J. Clin. Microbiol.*, 1994, **32**, 1650–1653.

## 4. NMR spectra of new compounds

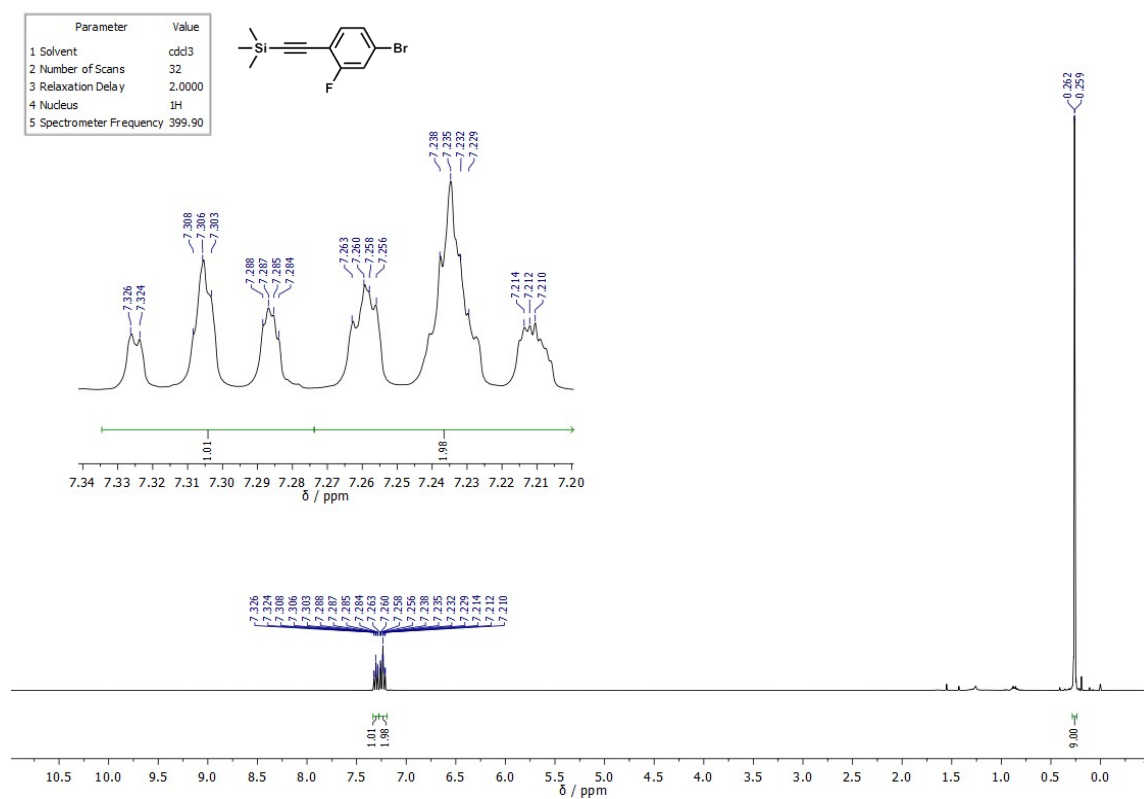

**Figure S4.1.** <sup>1</sup>H NMR (400 MHz, CDCl<sub>3</sub>) spectrum of **1a**.

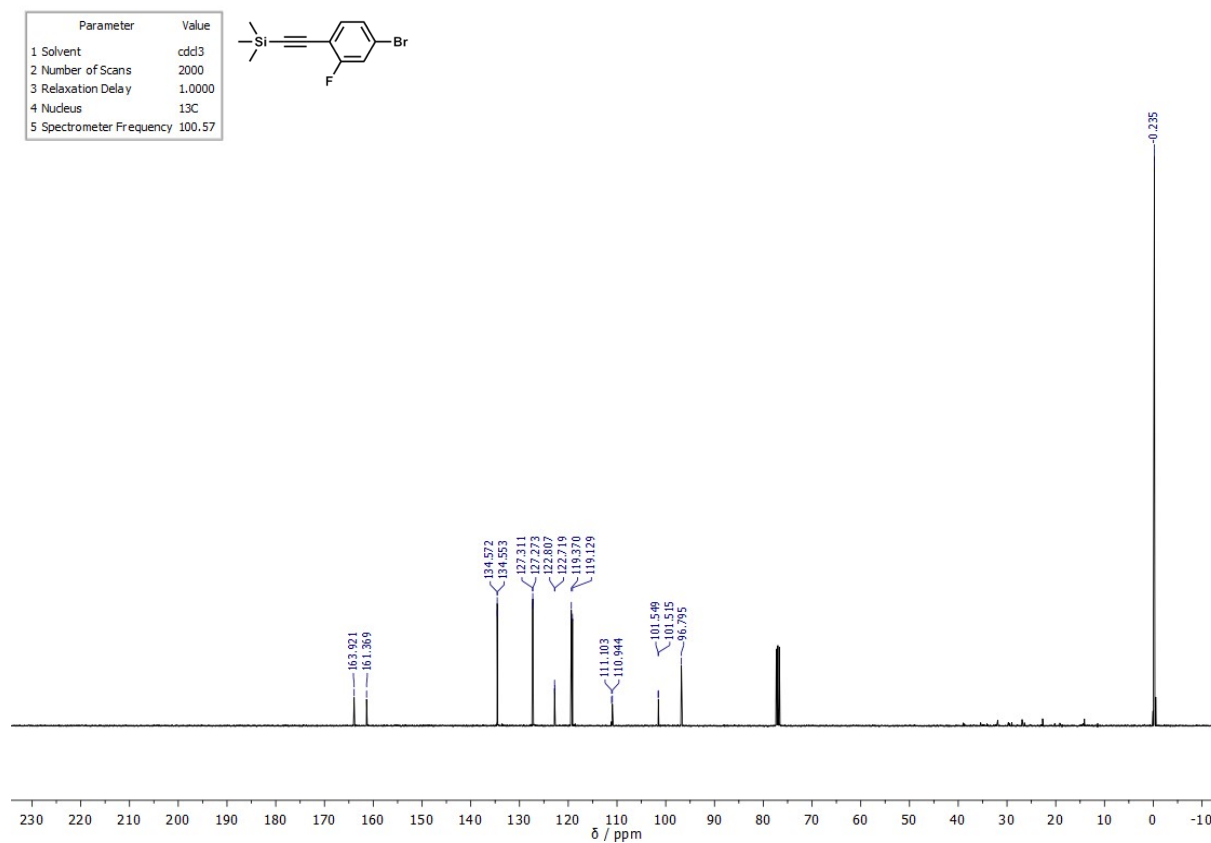

**Figure S4.2.** <sup>13</sup>C NMR (101 MHz, CDCl<sub>3</sub>) spectrum of **1a**.

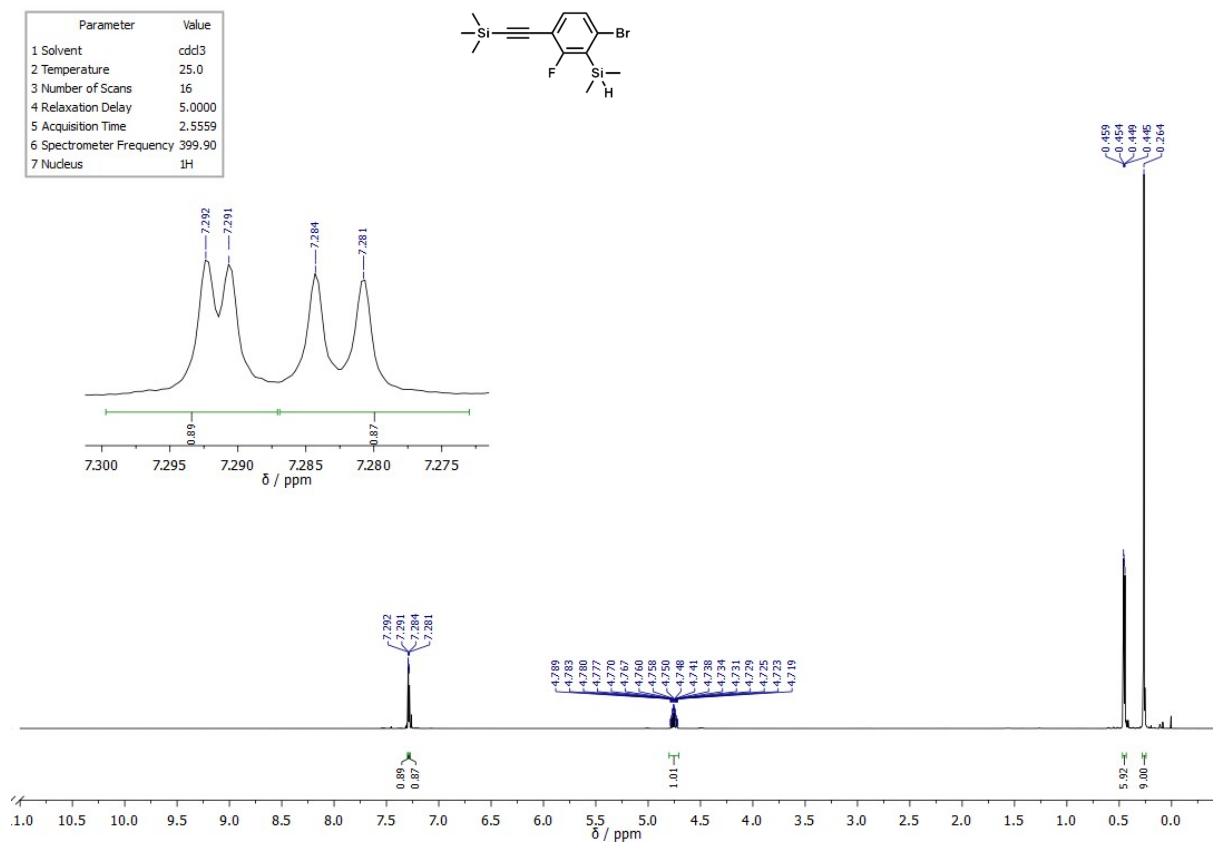

**Figure S4.3.** <sup>1</sup>H NMR (400 MHz, CDCl<sub>3</sub>) spectrum of **1b**.

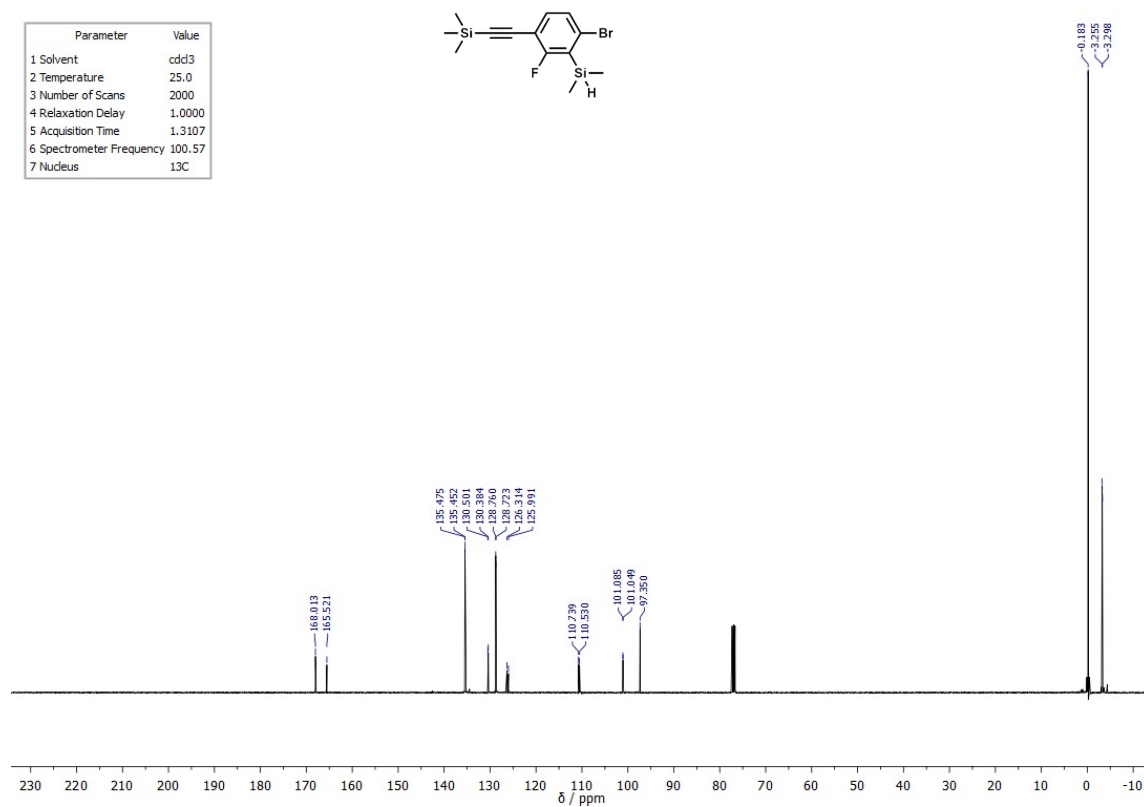

**Figure S4.4.** <sup>13</sup>C NMR (101 MHz, CDCl<sub>3</sub>) spectrum of **1b**.

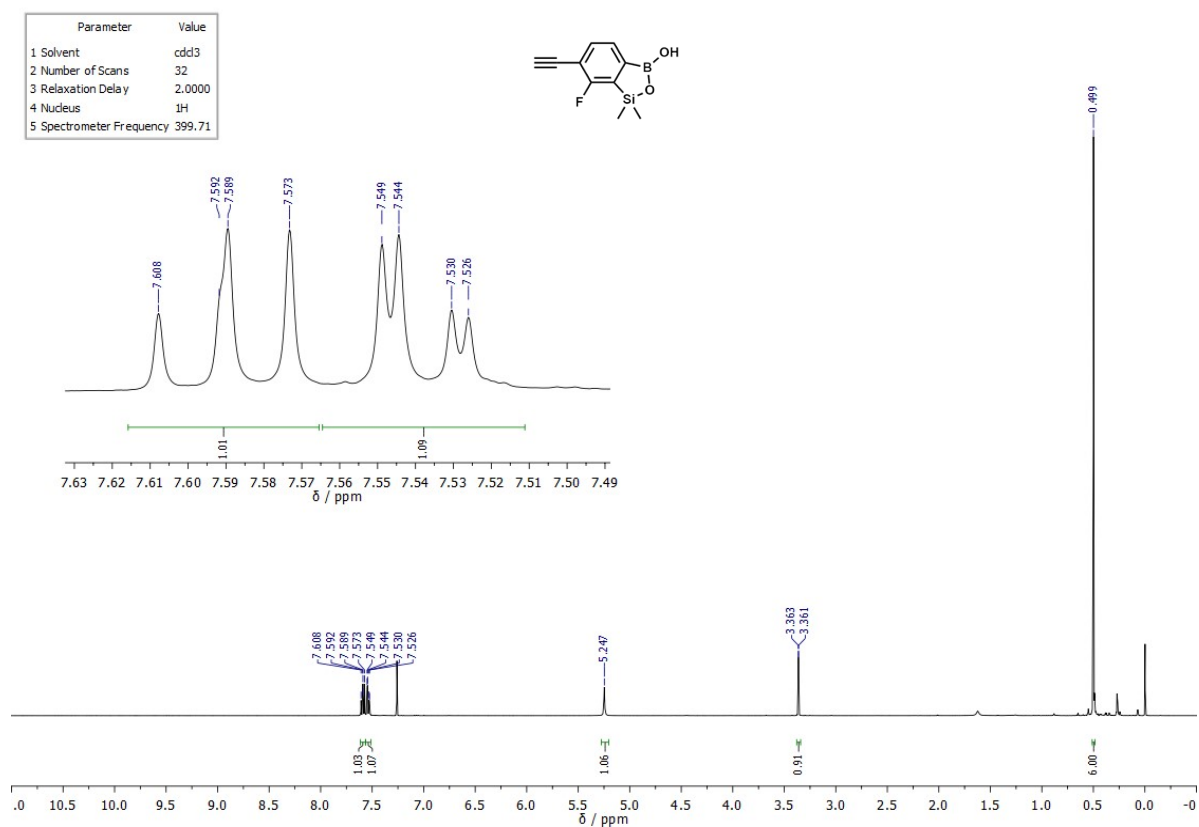

**Figure S4.5.** <sup>1</sup>H NMR (400 MHz, CDCl<sub>3</sub>) spectrum of **1c**.

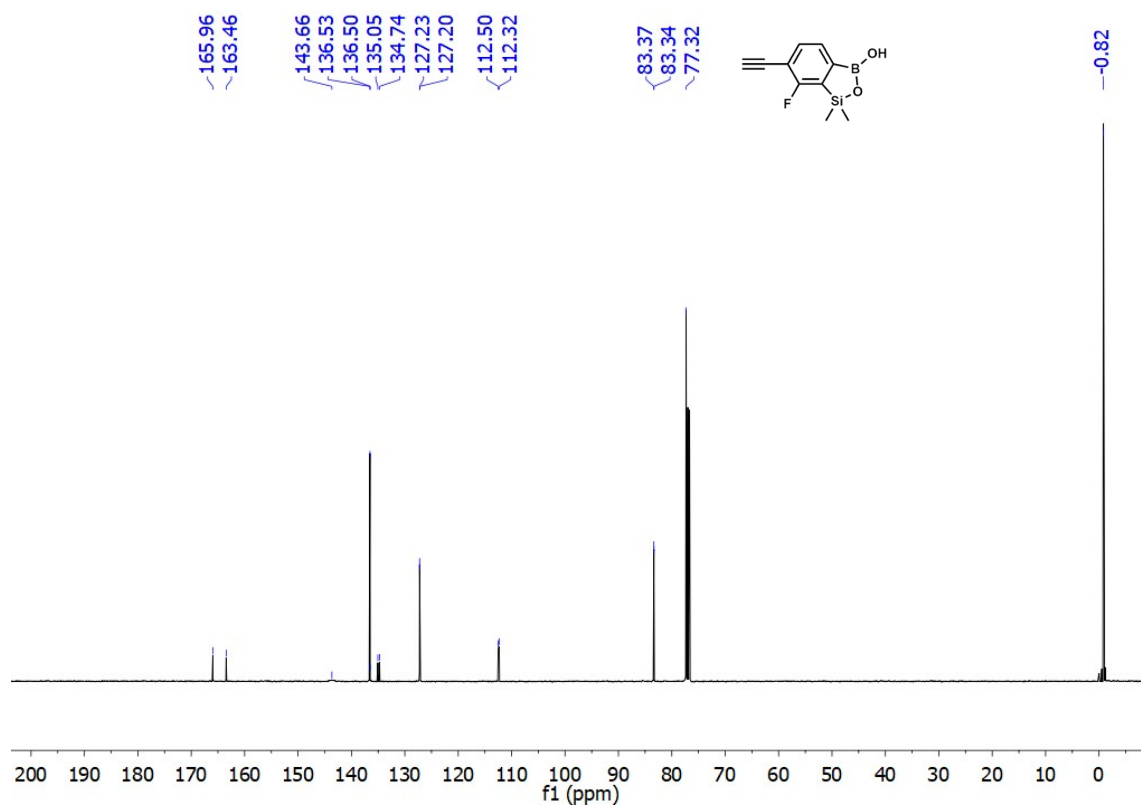

**Figure S4.6.** <sup>13</sup>C NMR (101 MHz, CDCl<sub>3</sub>) spectrum of **1c**.

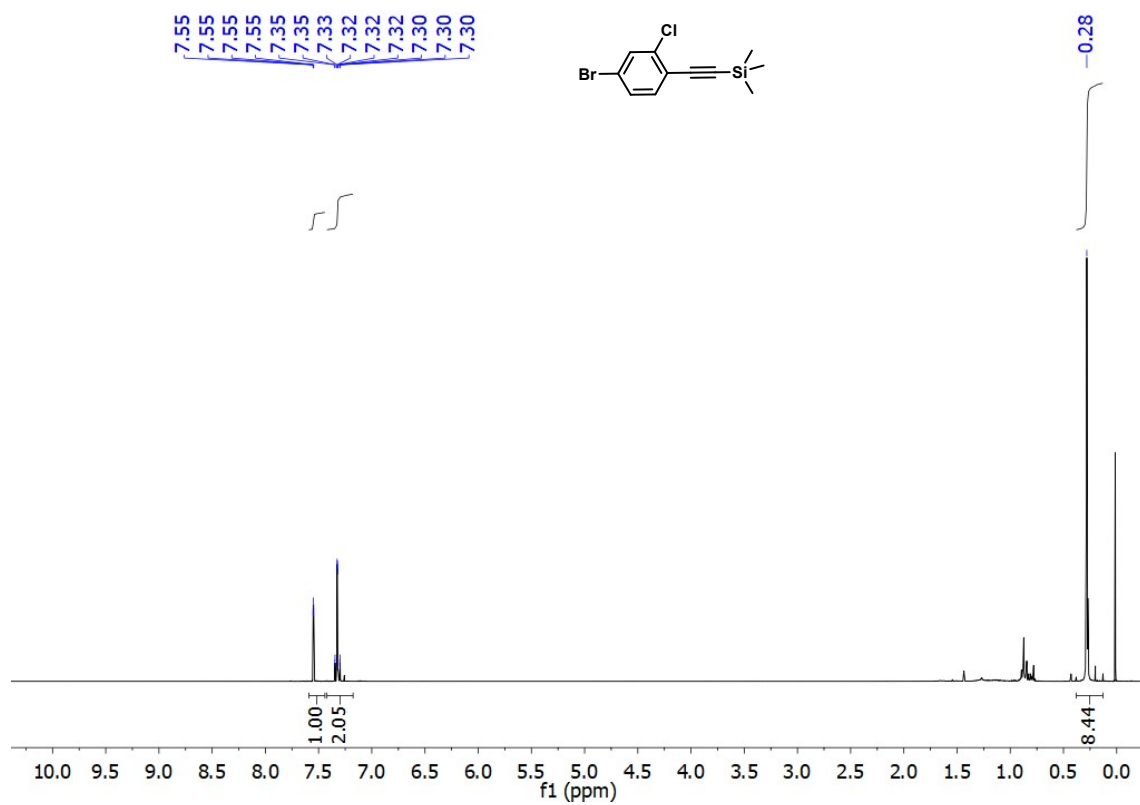

**Figure S4.7.**  $^1\text{H}$  NMR (400 MHz,  $\text{CDCl}_3$ ) spectrum of **2a**.

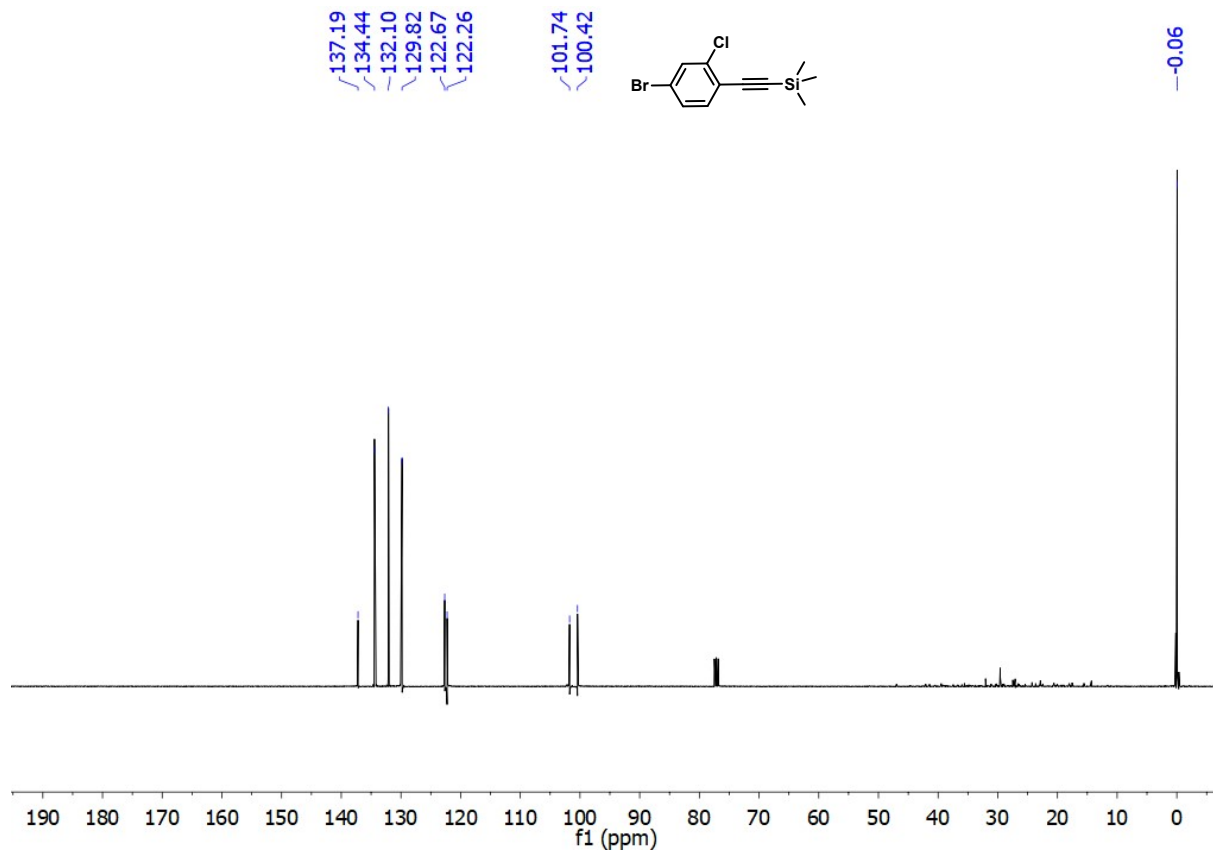

**Figure S4.8.**  $^{13}\text{C}$  NMR (101 MHz,  $\text{CDCl}_3$ ) spectrum of **2a**.

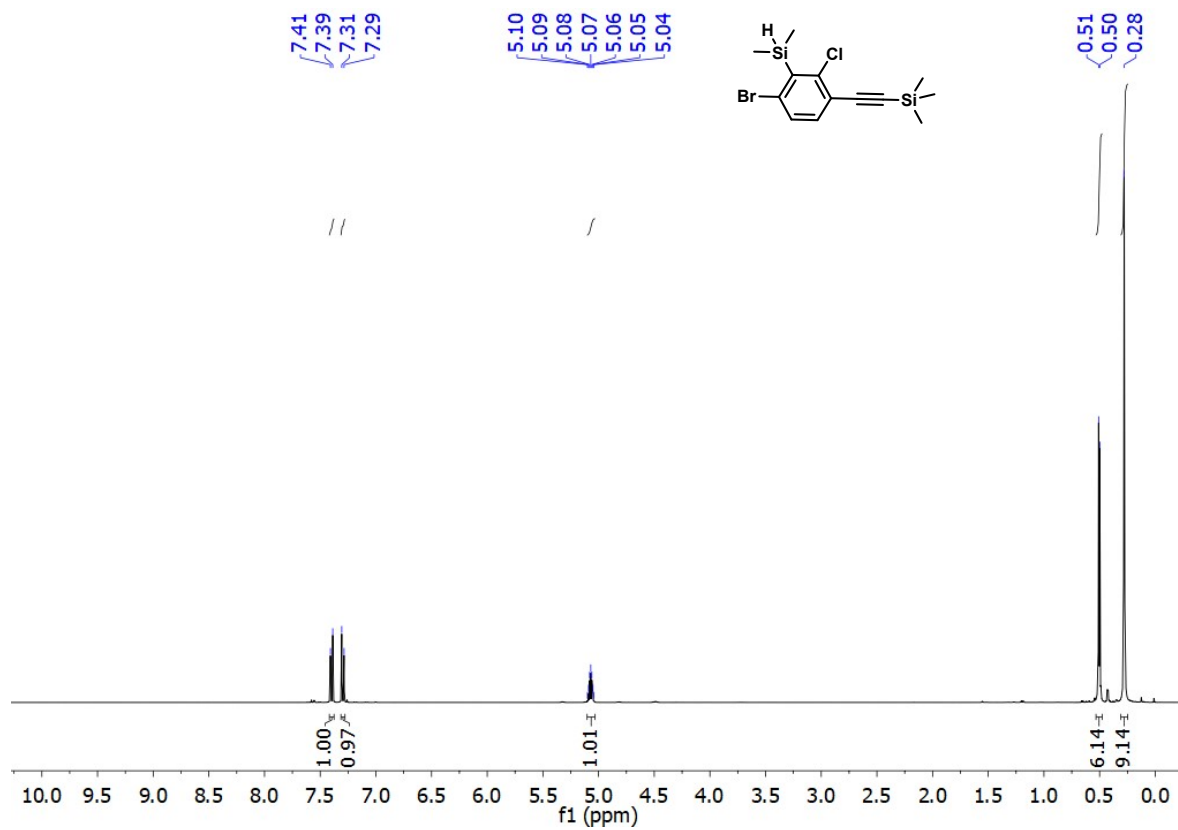

**Figure S4.9.** <sup>1</sup>H NMR (400 MHz, CDCl<sub>3</sub>) spectrum of **2b**.

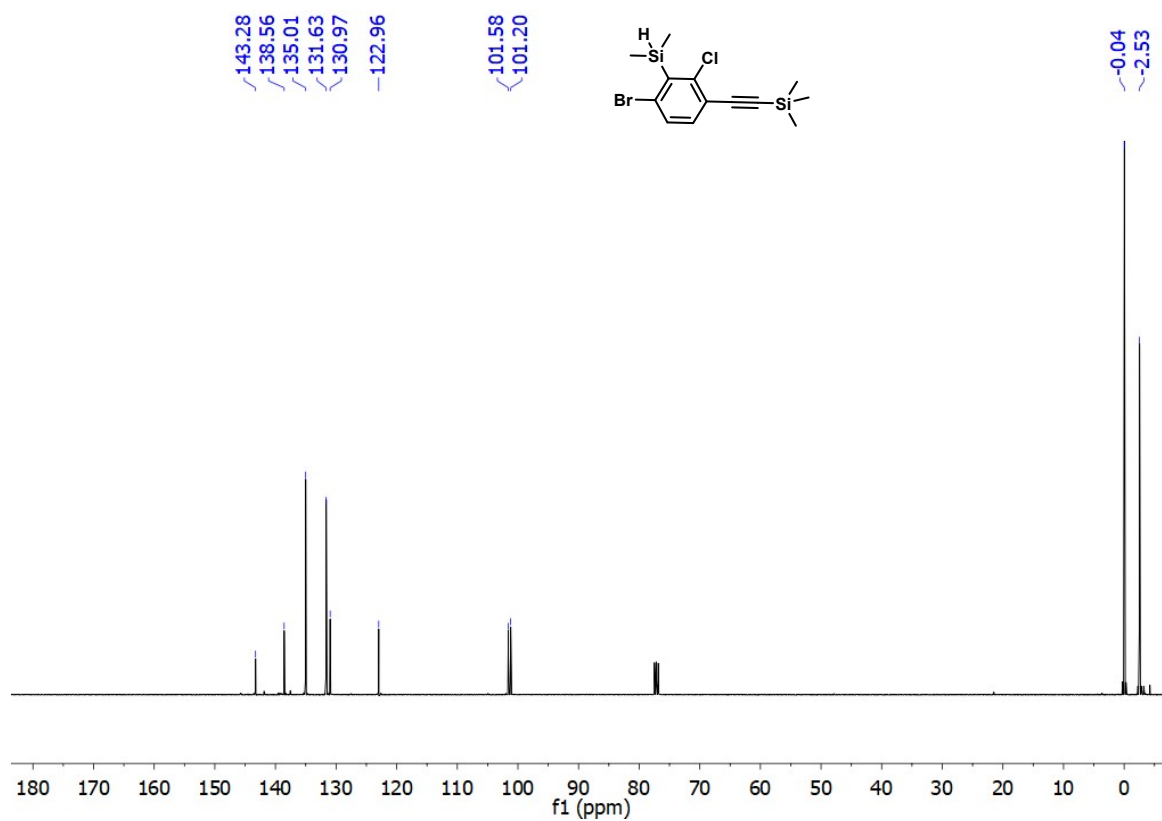

**Figure S4.10.** <sup>13</sup>C NMR (101 MHz, CDCl<sub>3</sub>) spectrum of **2b**.

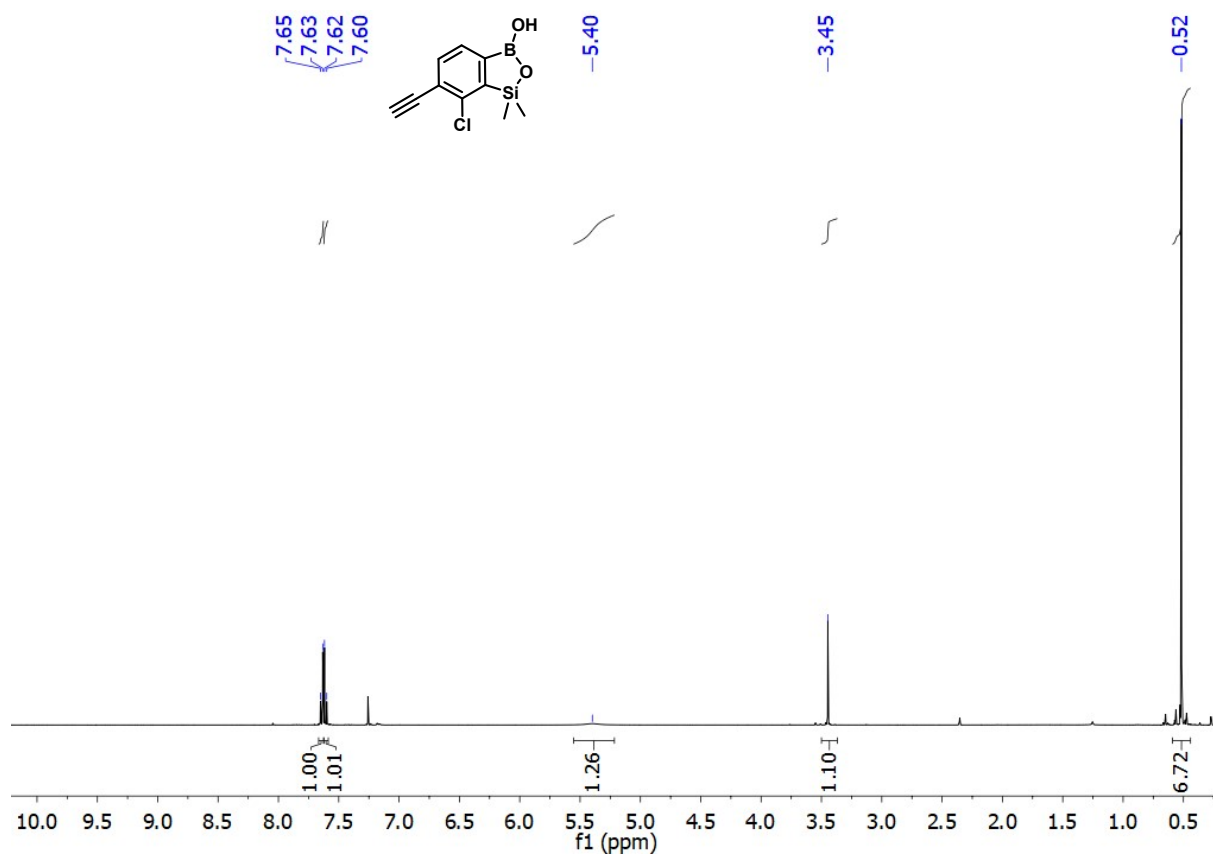

**Figure S4.11.** <sup>1</sup>H NMR (400 MHz, CDCl<sub>3</sub>) spectrum of **2c**.

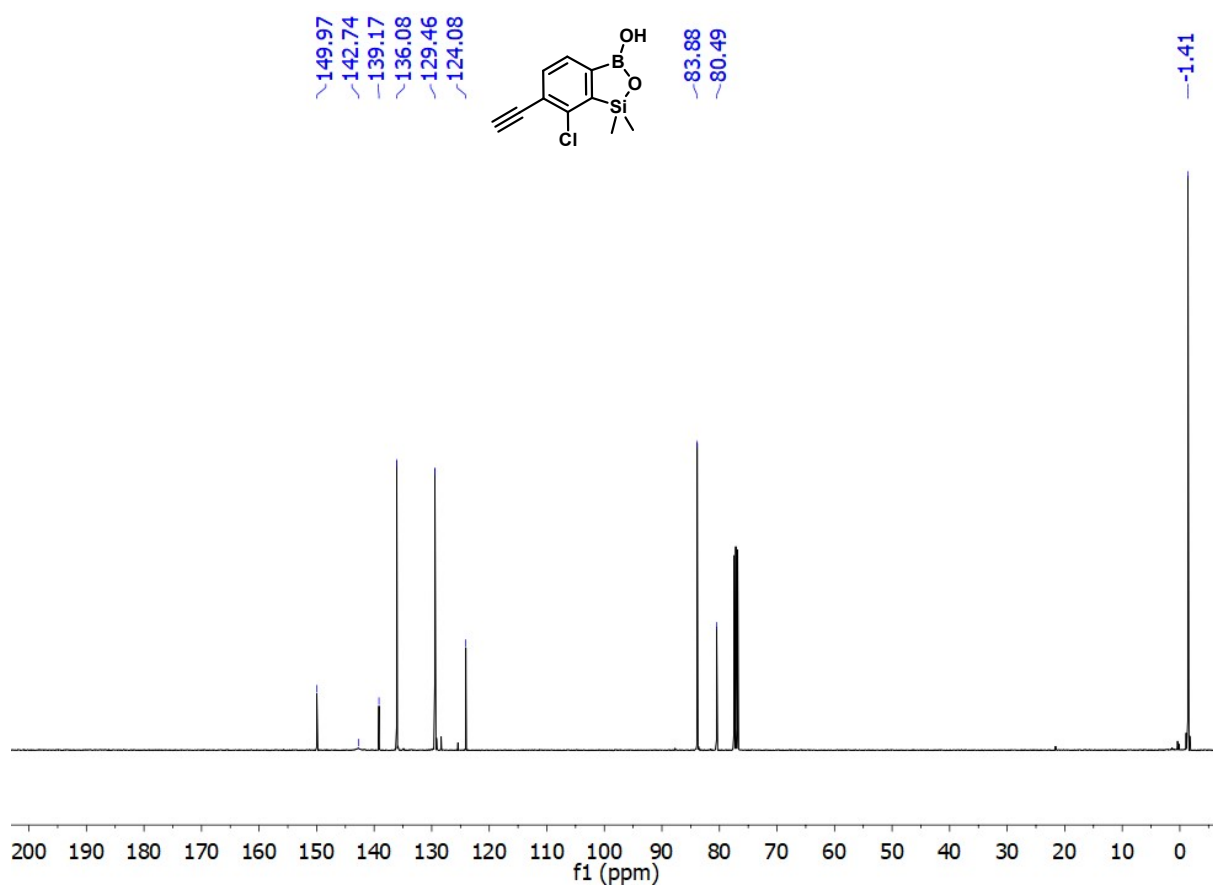

**Figure S4.12.** <sup>13</sup>C NMR (101 MHz, CDCl<sub>3</sub>) spectrum of **2c**.

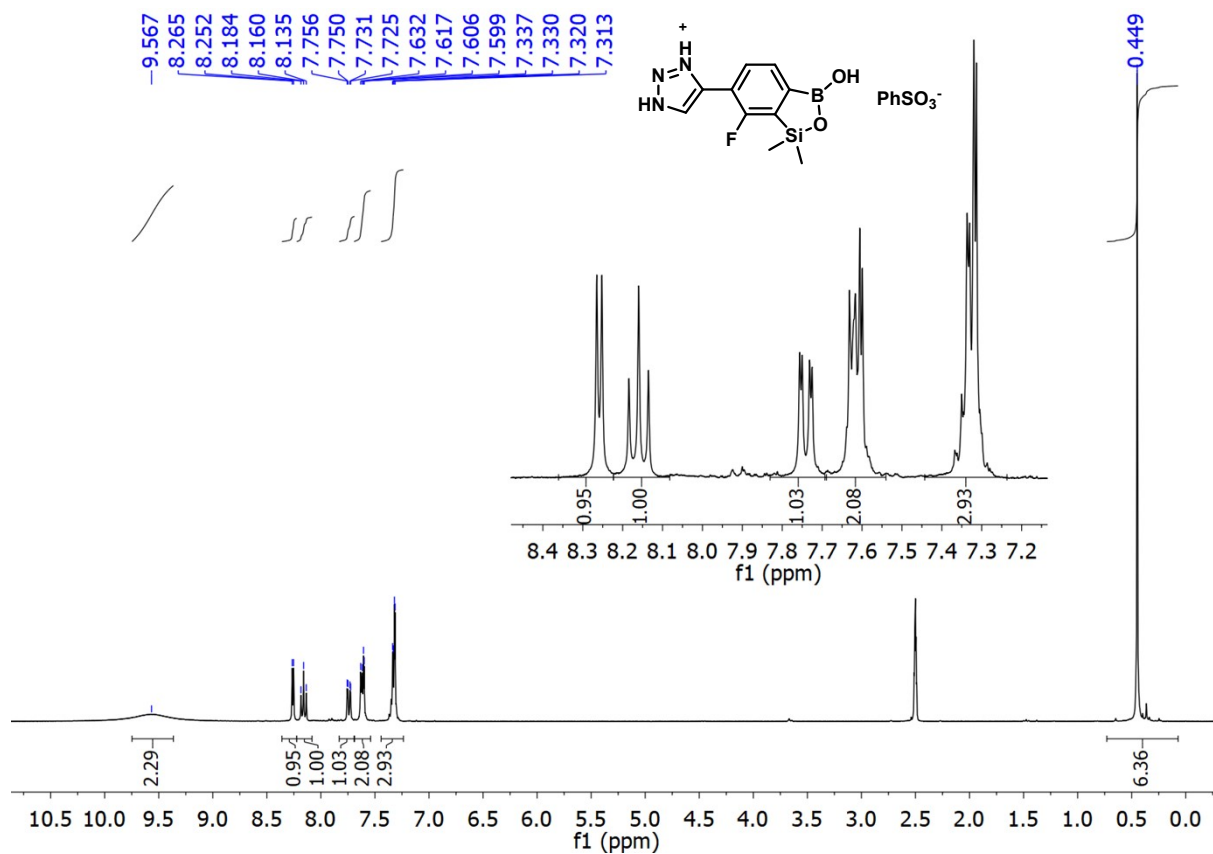

**Figure S4.13.**  $^1\text{H NMR}$  (400 MHz,  $\text{DMSO-}d_6$ ) spectrum of **3a**.

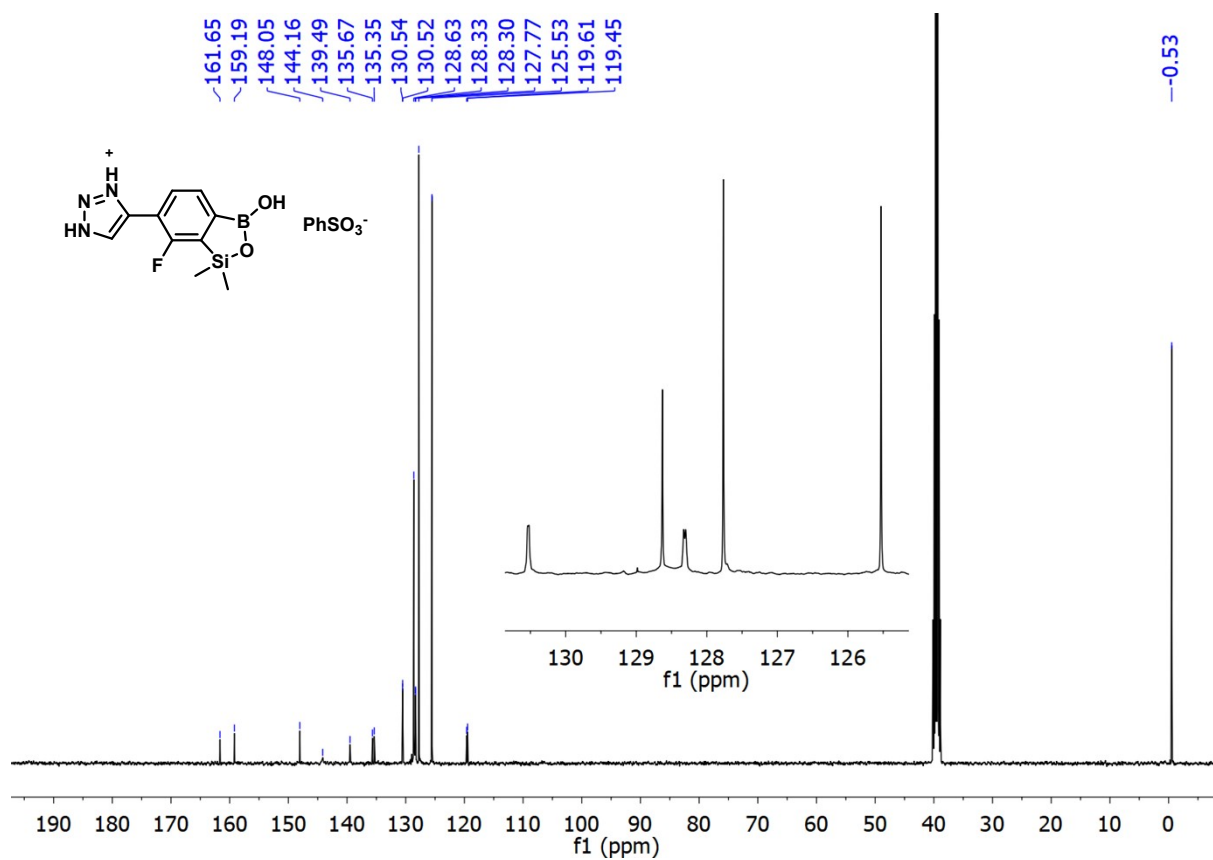

**Figure S4.14.**  $^{13}\text{C NMR}$  (101 MHz,  $\text{DMSO-}d_6$ ) spectrum of **3a**.



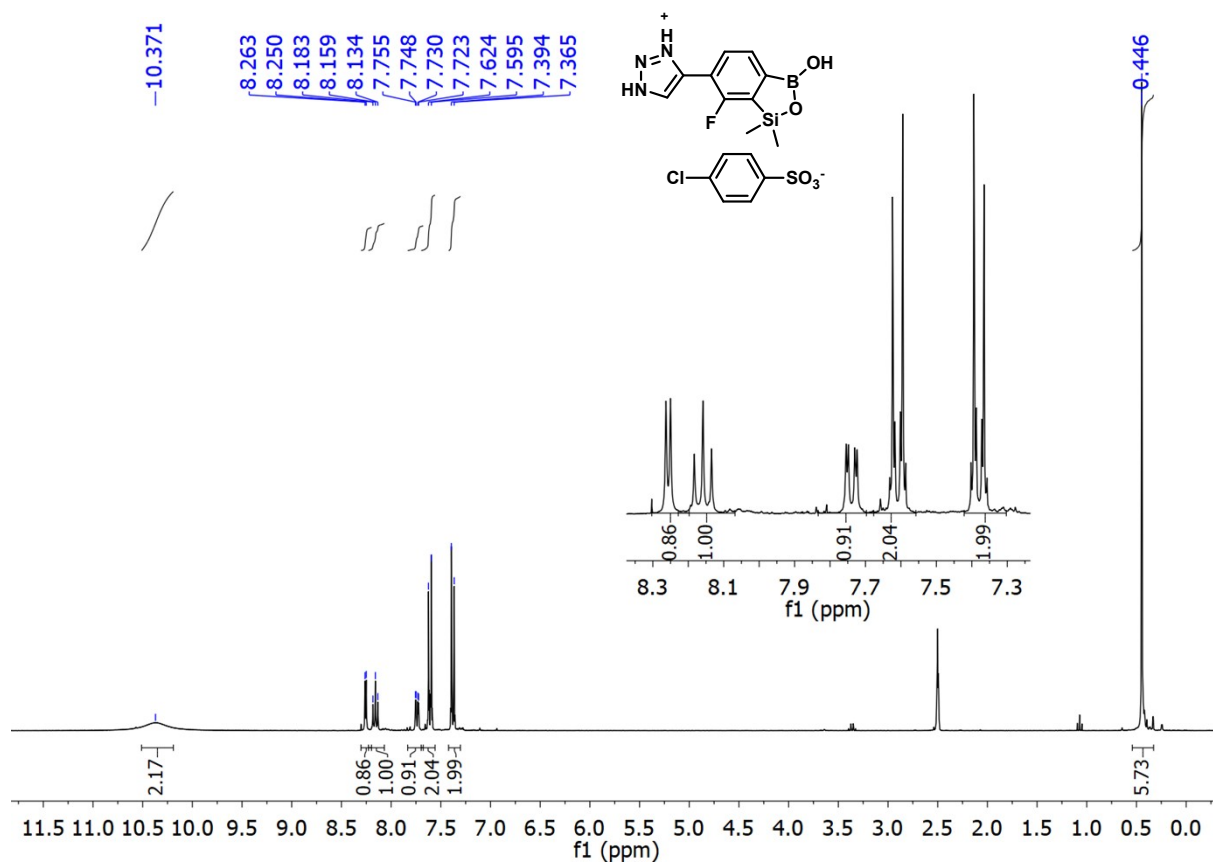

**Figure S4.15.**  $^1\text{H NMR}$  (400 MHz,  $\text{DMSO-}d_6$ ) spectrum of **3b**.

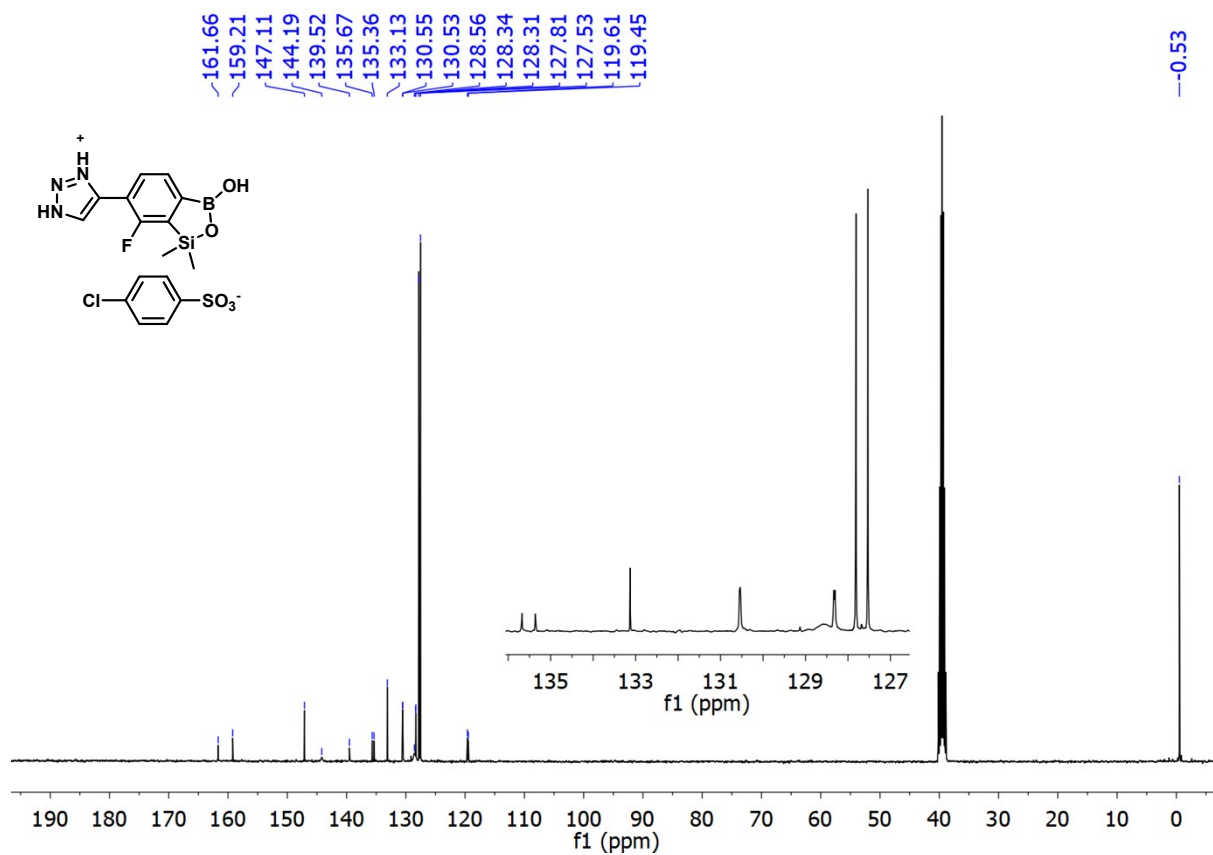

**Figure S4.16.**  $^{13}\text{C NMR}$  (101 MHz,  $\text{DMSO-}d_6$ ) spectrum of **3b**.

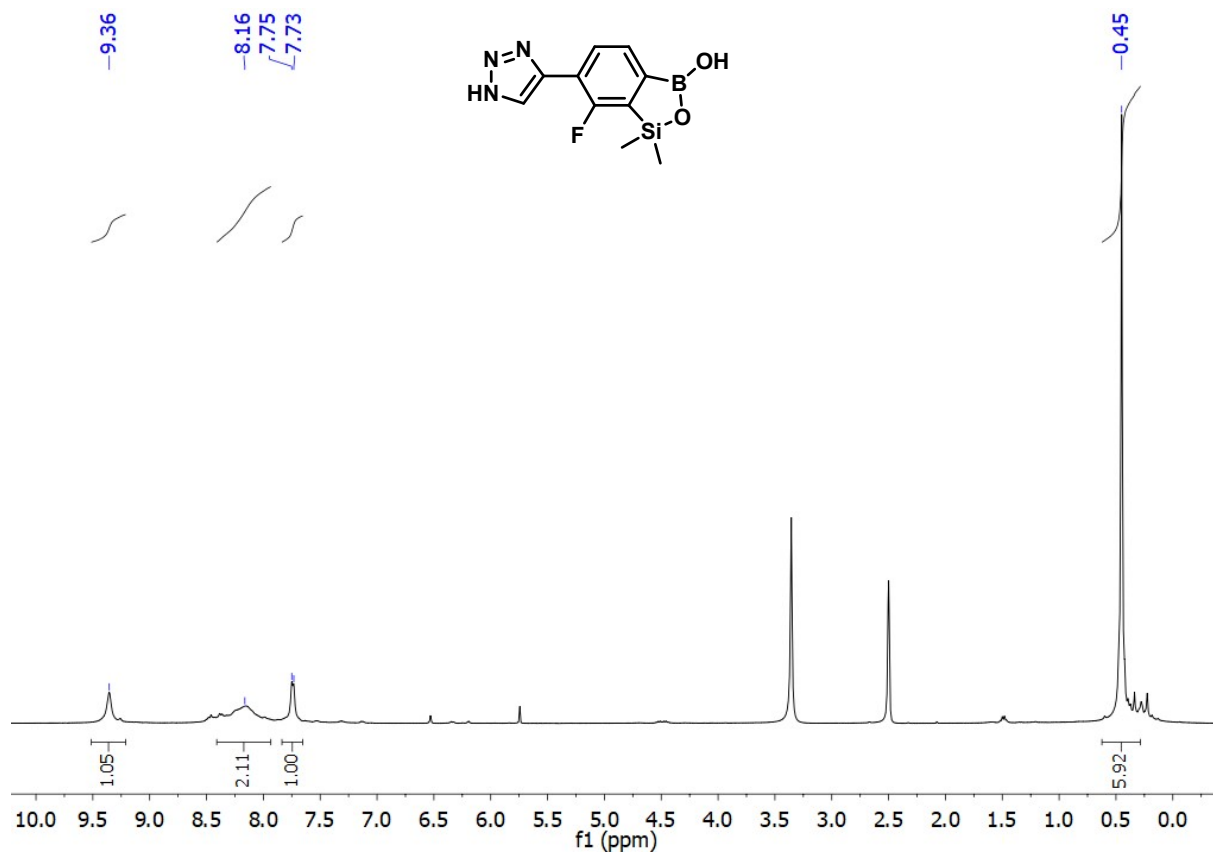

Figure S4.17.  $^1\text{H}$  NMR (400 MHz,  $\text{DMSO-}d_6$ ) spectrum of **3c**.

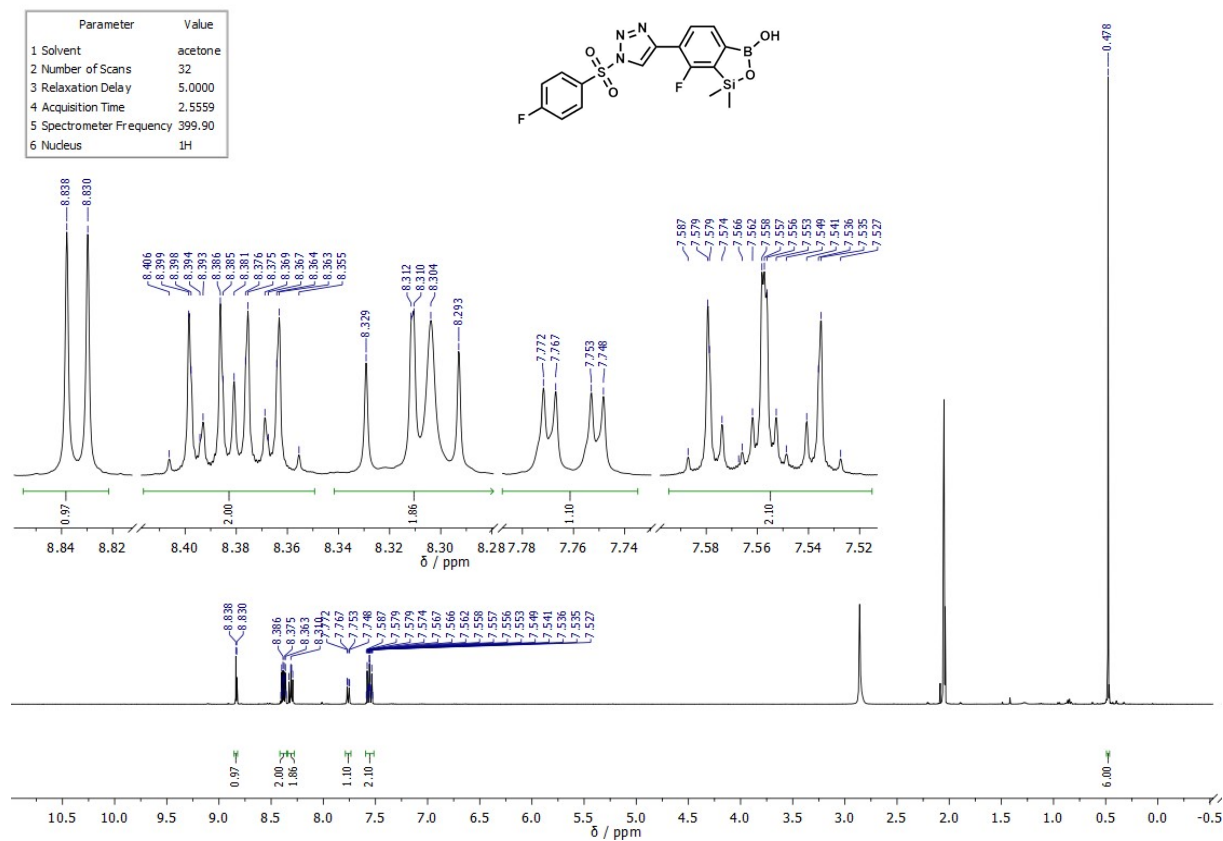

Figure S4.18.  $^1\text{H}$  NMR (400 MHz,  $\text{acetone-}d_6$ ) spectrum of **4a**.

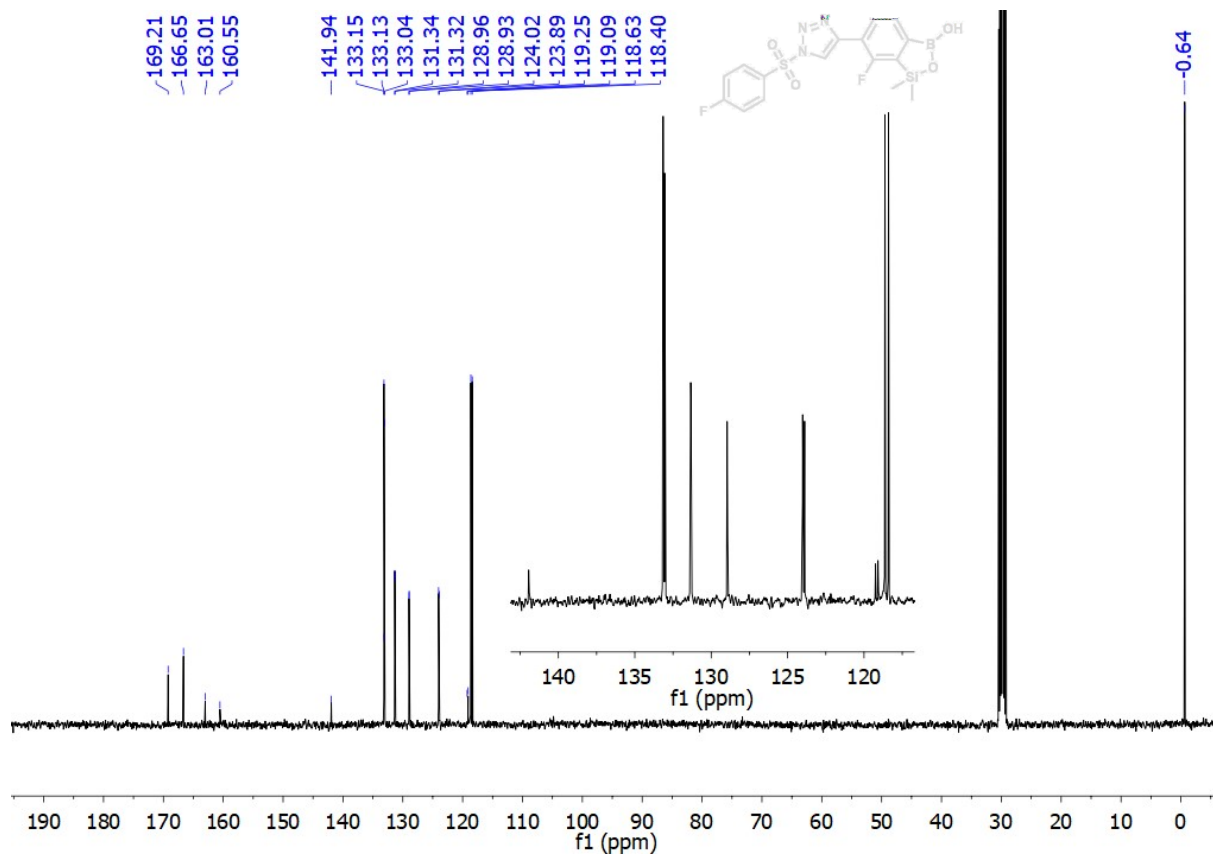

Figure S4.19. <sup>13</sup>C NMR (400 MHz, acetone-*d*<sub>6</sub>) spectrum of 4a.

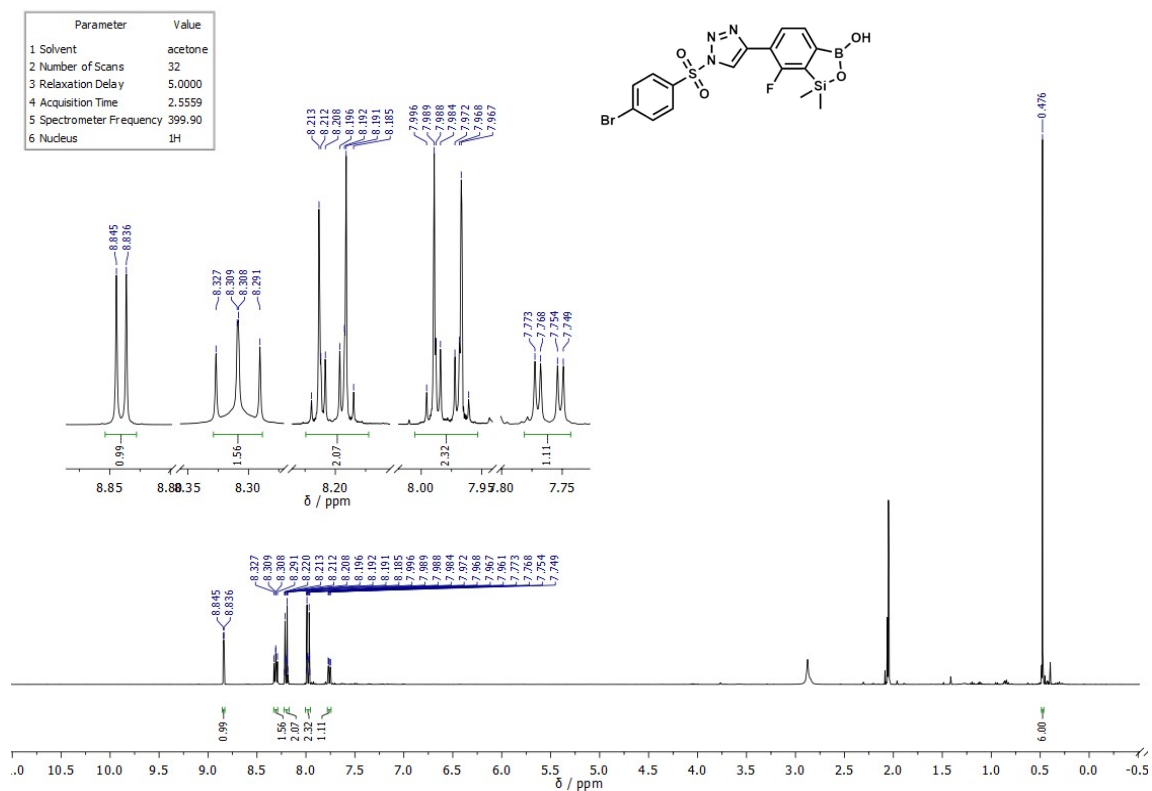

Figure S4.20. <sup>1</sup>H NMR (400 MHz, acetone-*d*<sub>6</sub>) spectrum of 4b.

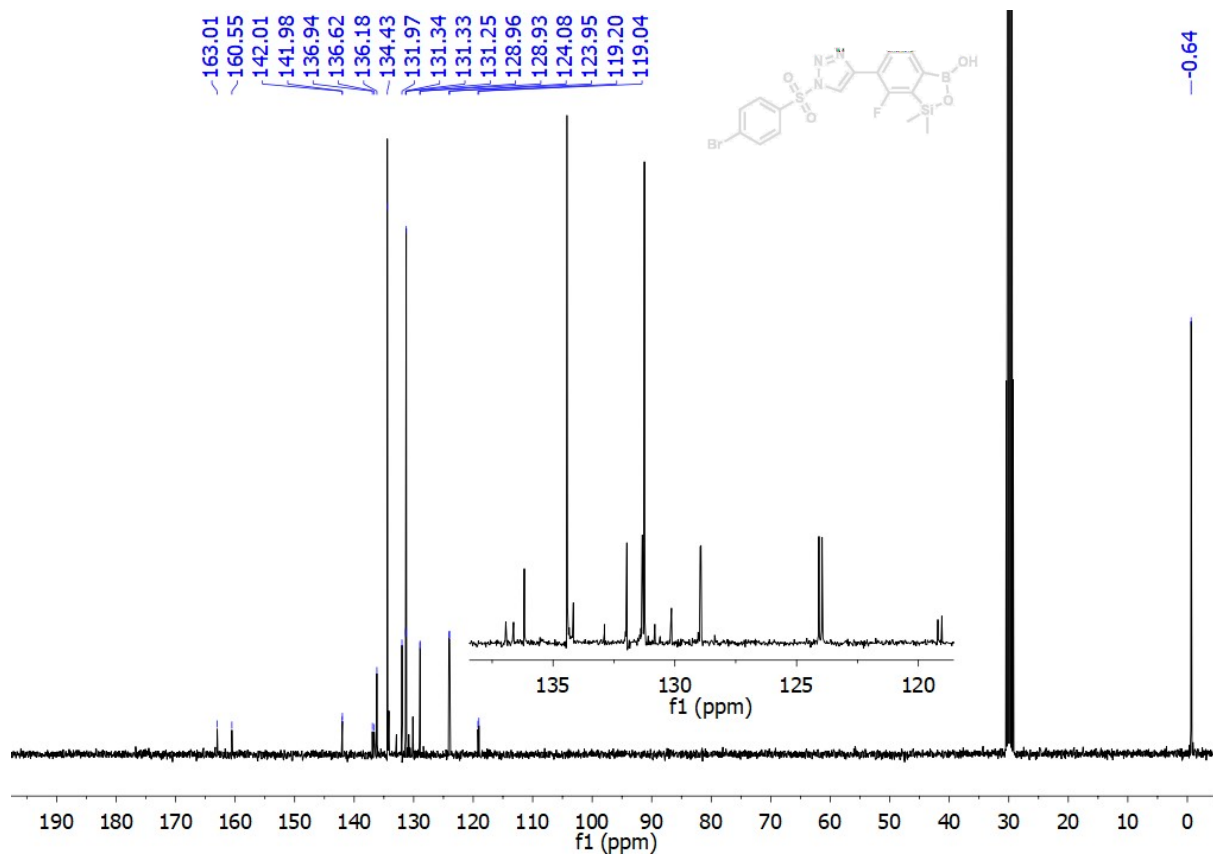

Figure S4.21. <sup>13</sup>C NMR (400 MHz, acetone-*d*<sub>6</sub>) spectrum of **4b**.

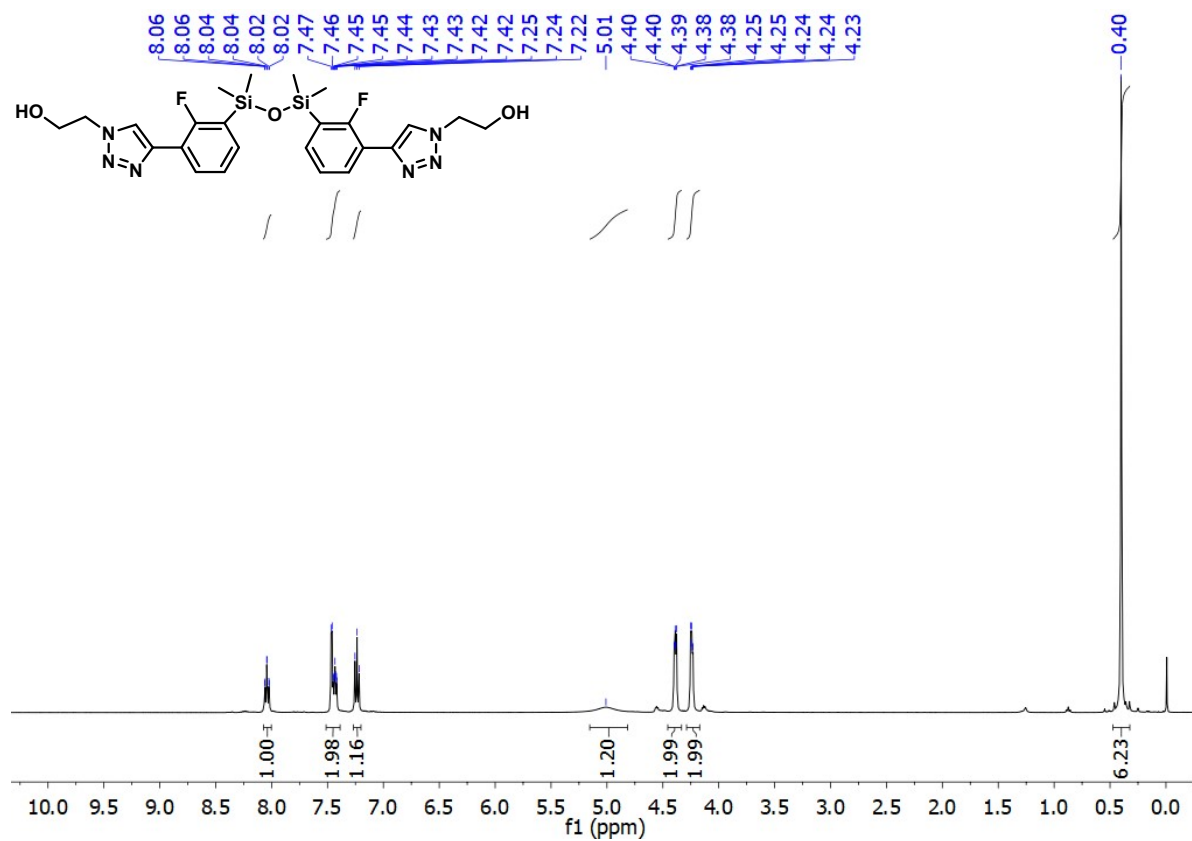

Figure S4.22. <sup>1</sup>H NMR (400 MHz, CDCl<sub>3</sub>) spectrum of **5a**.

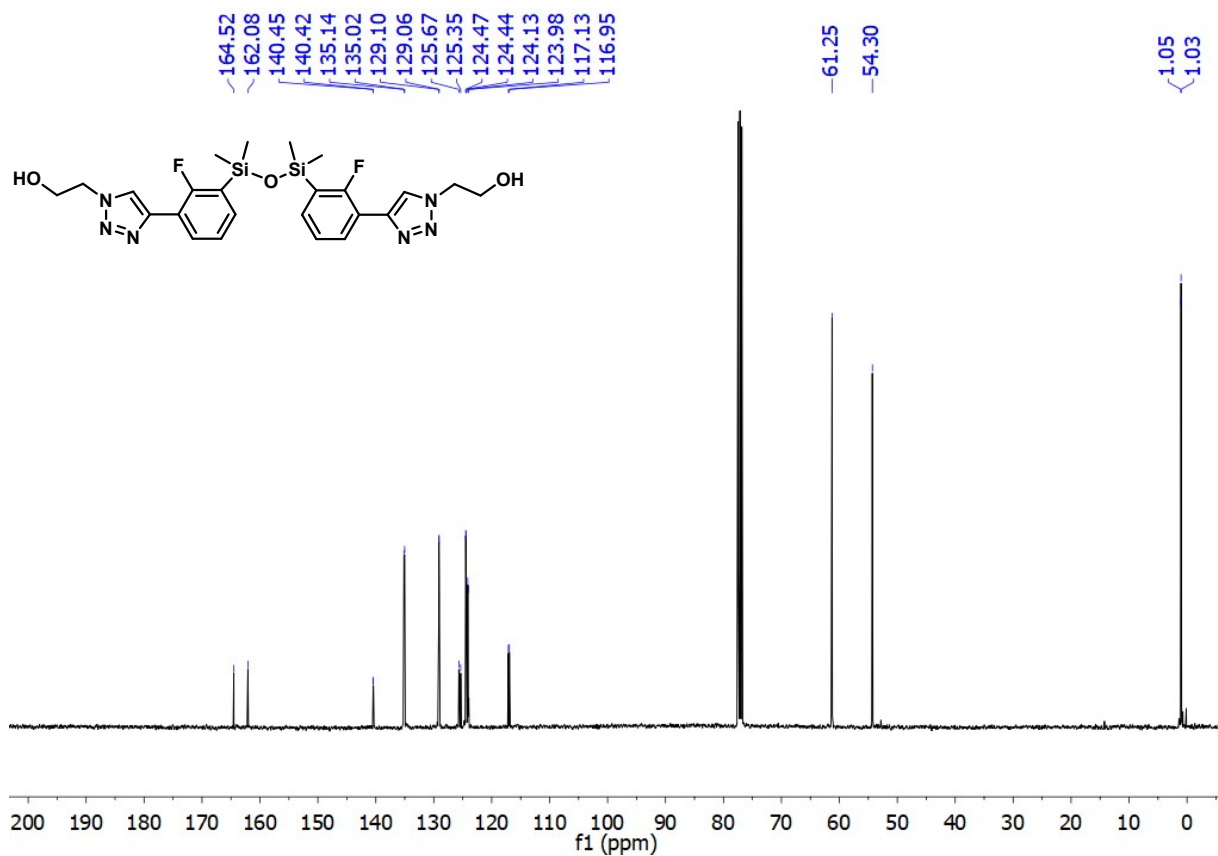

**Figure S4.23.** <sup>13</sup>C NMR (101 MHz, CDCl<sub>3</sub>) spectrum of **5a**.

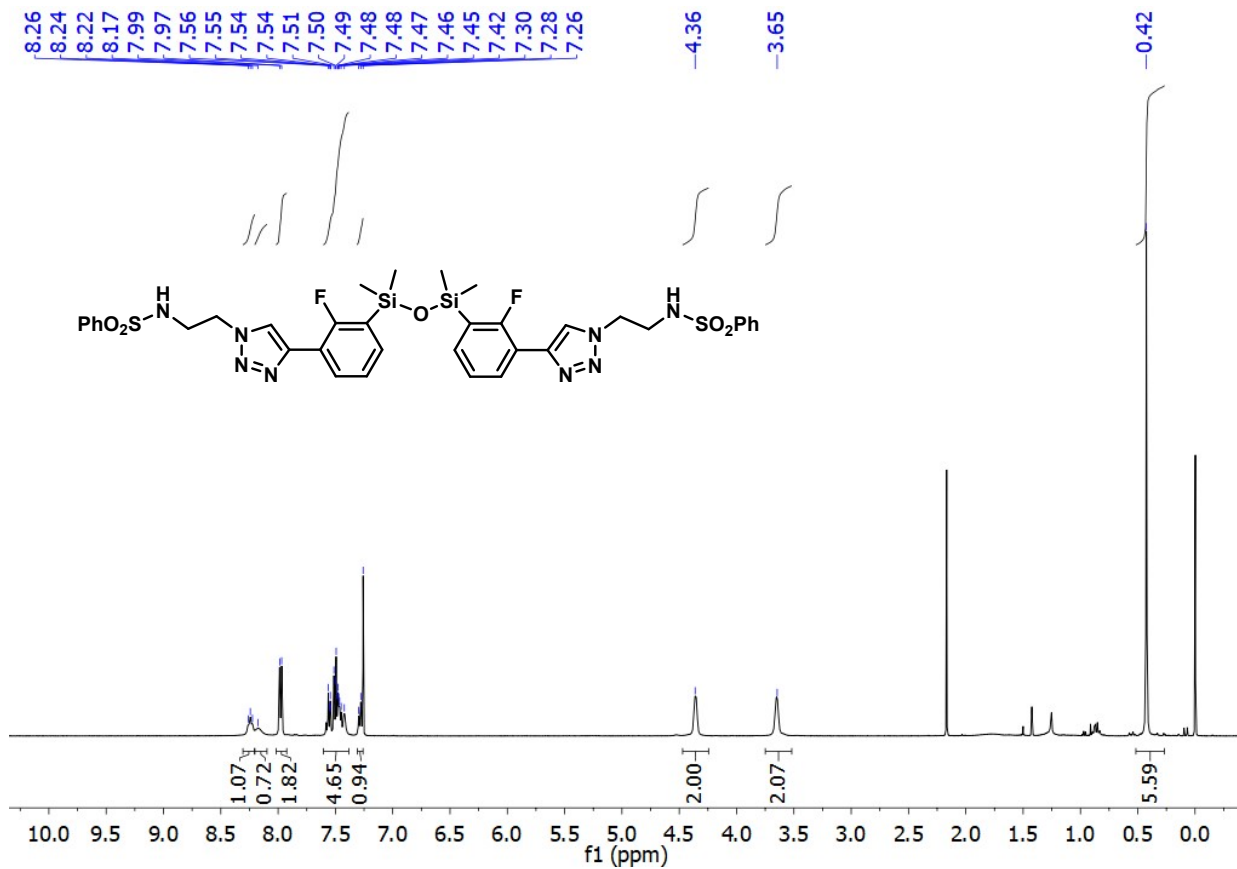

**Figure S4.24.** <sup>1</sup>H NMR (400 MHz, CDCl<sub>3</sub>) spectrum of **5b**.

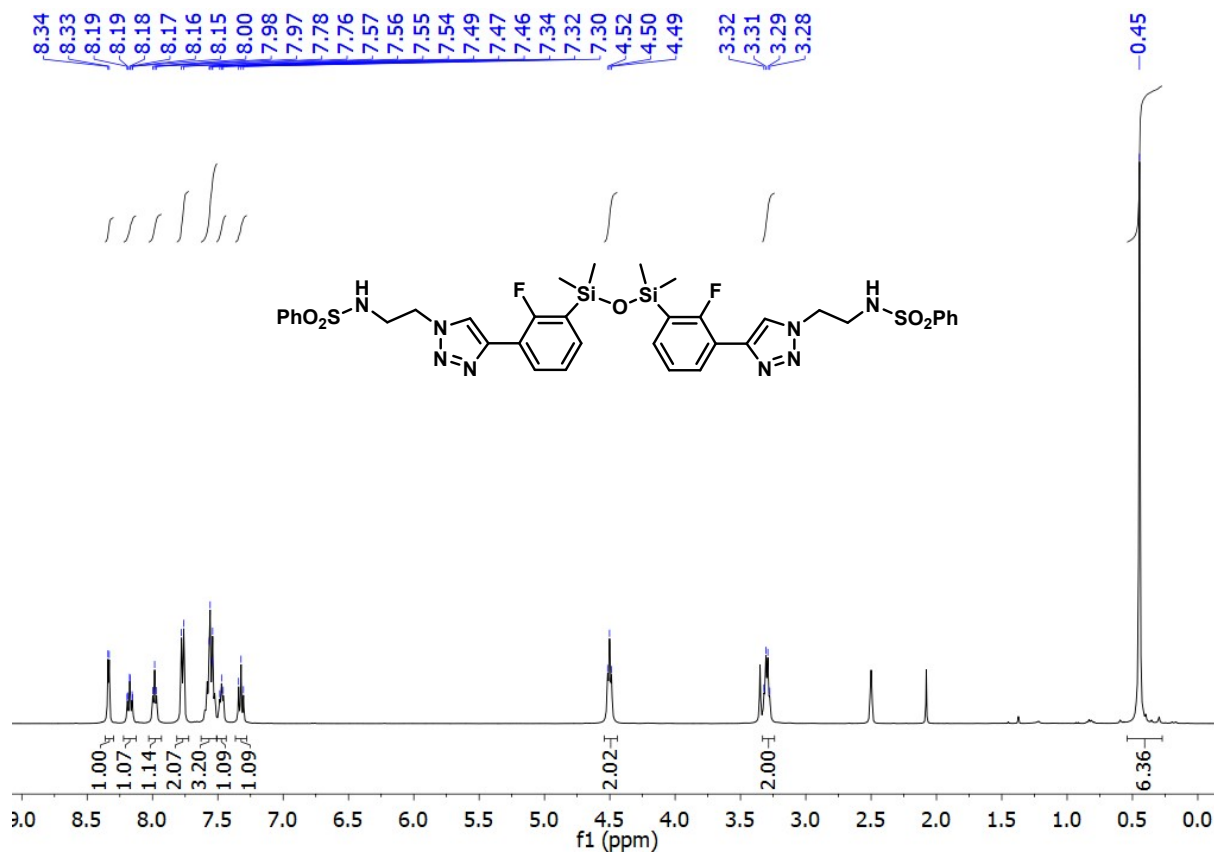

**Figure S4.25.**  $^1\text{H NMR}$  (400 MHz,  $\text{DMSO-}d_6$ ) spectrum of **5b**.

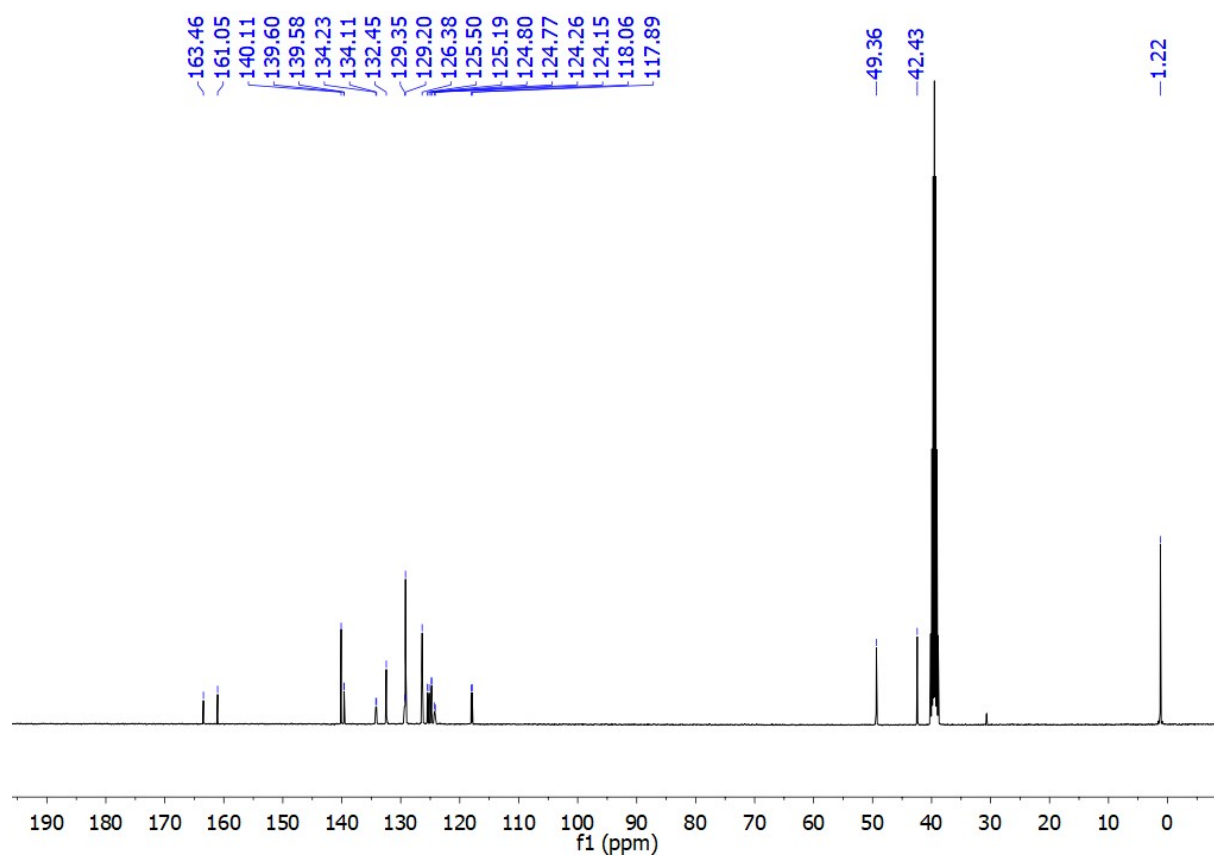

**Figure S4.26.**  $^{13}\text{C NMR}$  (101 MHz,  $\text{DMSO-}d_6$ ) spectrum of **5b**.
